# Supplementary material for: The global governance of antimicrobial resistance: a cross-country study of alignment between the global action plan and national action plans
Source: Global Health. 2020 Nov 11;16:109. doi: 10.1186/s12992-020-00639-3 (PMC7656753; doi:10.1186/s12992-020-00639-3)
Supplement: Supplementary file 2 — Additional file 2. [file 12992_2020_639_MOESM2_ESM.csv]

NAP	Income_group	Geography_group	Syntactic_Indicator
Ethiopia Strategy for the Prevention and Containment of Antimicrobial Resistance.docx	1	1	4,83
Sierra Leone National Strategic Plan for Combating AMR.docx	1	1	9,69
Tanzania National Action Plan on Antimicrobial Resistance.docx	1	1	9,31
Uganda AMR National Action Plan.docx	1	1	8,65
Zambia, Multisectoral National Action Plan on AMR.docx	1	1	9,75
Ethiopia Strategy for the Prevention and Containment of Antimicrobial Resistance.docx	1	1	3,81
Sierra Leone National Strategic Plan for Combating AMR.docx	1	1	4,4
Tanzania National Action Plan on Antimicrobial Resistance.docx	1	1	4,69
Uganda AMR National Action Plan.docx	1	1	5,2
Zambia, Multisectoral National Action Plan on AMR.docx	1	1	4,16
Ethiopia Strategy for the Prevention and Containment of Antimicrobial Resistance.docx	1	1	5,79
Sierra Leone National Strategic Plan for Combating AMR.docx	1	1	14,98
Tanzania National Action Plan on Antimicrobial Resistance.docx	1	1	14,77
Uganda AMR National Action Plan.docx	1	1	9,88
Zambia, Multisectoral National Action Plan on AMR.docx	1	1	16,92
Ethiopia Strategy for the Prevention and Containment of Antimicrobial Resistance.docx	1	1	4,35
Sierra Leone National Strategic Plan for Combating AMR.docx	1	1	5,46
Tanzania National Action Plan on Antimicrobial Resistance.docx	1	1	5,65
Uganda AMR National Action Plan.docx	1	1	5,99
Zambia, Multisectoral National Action Plan on AMR.docx	1	1	5,41
Ethiopia Strategy for the Prevention and Containment of Antimicrobial Resistance.docx	1	1	6,57
Sierra Leone National Strategic Plan for Combating AMR.docx	1	1	14,39
Tanzania National Action Plan on Antimicrobial Resistance.docx	1	1	12,8
Uganda AMR National Action Plan.docx	1	1	10,51
Zambia, Multisectoral National Action Plan on AMR.docx	1	1	11,36
Ethiopia Strategy for the Prevention and Containment of Antimicrobial Resistance.docx	1	1	2,78
Sierra Leone National Strategic Plan for Combating AMR.docx	1	1	3,49
Tanzania National Action Plan on Antimicrobial Resistance.docx	1	1	4,81
Uganda AMR National Action Plan.docx	1	1	4,32
Zambia, Multisectoral National Action Plan on AMR.docx	1	1	5,63
Ethiopia Strategy for the Prevention and Containment of Antimicrobial Resistance.docx	1	1	4,58
Sierra Leone National Strategic Plan for Combating AMR.docx	1	1	4,63
Tanzania National Action Plan on Antimicrobial Resistance.docx	1	1	4,83
Uganda AMR National Action Plan.docx	1	1	5,78
Zambia, Multisectoral National Action Plan on AMR.docx	1	1	5,02
Ethiopia Strategy for the Prevention and Containment of Antimicrobial Resistance.docx	1	1	2,63
Sierra Leone National Strategic Plan for Combating AMR.docx	1	1	1,42
Tanzania National Action Plan on Antimicrobial Resistance.docx	1	1	2,17
Uganda AMR National Action Plan.docx	1	1	3,45
Zambia, Multisectoral National Action Plan on AMR.docx	1	1	2,38
Ethiopia Strategy for the Prevention and Containment of Antimicrobial Resistance.docx	1	1	2,16
Sierra Leone National Strategic Plan for Combating AMR.docx	1	1	4,44
Tanzania National Action Plan on Antimicrobial Resistance.docx	1	1	4,73
Uganda AMR National Action Plan.docx	1	1	3,32
Zambia, Multisectoral National Action Plan on AMR.docx	1	1	3,24
Ethiopia Strategy for the Prevention and Containment of Antimicrobial Resistance.docx	1	1
Sierra Leone National Strategic Plan for Combating AMR.docx	1	1	8,63
Tanzania National Action Plan on Antimicrobial Resistance.docx	1	1	5,97
Uganda AMR National Action Plan.docx	1	1	17,79
Zambia, Multisectoral National Action Plan on AMR.docx	1	1	7,02
Ethiopia Strategy for the Prevention and Containment of Antimicrobial Resistance.docx	1	1	4,22
Sierra Leone National Strategic Plan for Combating AMR.docx	1	1	14,39
Tanzania National Action Plan on Antimicrobial Resistance.docx	1	1	9,57
Uganda AMR National Action Plan.docx	1	1	10,85
Zambia, Multisectoral National Action Plan on AMR.docx	1	1	12,01
Ethiopia Strategy for the Prevention and Containment of Antimicrobial Resistance.docx	1	1	3,14
Sierra Leone National Strategic Plan for Combating AMR.docx	1	1	4,67
Tanzania National Action Plan on Antimicrobial Resistance.docx	1	1	4,63
Uganda AMR National Action Plan.docx	1	1	6,51
Zambia, Multisectoral National Action Plan on AMR.docx	1	1	5,04
Ethiopia Strategy for the Prevention and Containment of Antimicrobial Resistance.docx	1	1	1,39
Sierra Leone National Strategic Plan for Combating AMR.docx	1	1	1,59
Tanzania National Action Plan on Antimicrobial Resistance.docx	1	1	1,84
Uganda AMR National Action Plan.docx	1	1	2,16
Zambia, Multisectoral National Action Plan on AMR.docx	1	1	1,85
Ethiopia Strategy for the Prevention and Containment of Antimicrobial Resistance.docx	1	1	1,73
Sierra Leone National Strategic Plan for Combating AMR.docx	1	1	2,35
Tanzania National Action Plan on Antimicrobial Resistance.docx	1	1	2,79
Uganda AMR National Action Plan.docx	1	1	2,49
Zambia, Multisectoral National Action Plan on AMR.docx	1	1	2,5
Ethiopia Strategy for the Prevention and Containment of Antimicrobial Resistance.docx	1	1	3,64
Sierra Leone National Strategic Plan for Combating AMR.docx	1	1	8,82
Tanzania National Action Plan on Antimicrobial Resistance.docx	1	1	7,88
Uganda AMR National Action Plan.docx	1	1	7,41
Zambia, Multisectoral National Action Plan on AMR.docx	1	1	9,25
Ethiopia Strategy for the Prevention and Containment of Antimicrobial Resistance.docx	1	1	3,55
Sierra Leone National Strategic Plan for Combating AMR.docx	1	1	7,64
Tanzania National Action Plan on Antimicrobial Resistance.docx	1	1	10,24
Uganda AMR National Action Plan.docx	1	1	5,97
Zambia, Multisectoral National Action Plan on AMR.docx	1	1	8,23
Ethiopia Strategy for the Prevention and Containment of Antimicrobial Resistance.docx	1	1	3,28
Sierra Leone National Strategic Plan for Combating AMR.docx	1	1	6,35
Tanzania National Action Plan on Antimicrobial Resistance.docx	1	1	5
Uganda AMR National Action Plan.docx	1	1	7,18
Zambia, Multisectoral National Action Plan on AMR.docx	1	1	6,3
Ethiopia Strategy for the Prevention and Containment of Antimicrobial Resistance.docx	1	1	4,01
Sierra Leone National Strategic Plan for Combating AMR.docx	1	1	10,31
Tanzania National Action Plan on Antimicrobial Resistance.docx	1	1	12,33
Uganda AMR National Action Plan.docx	1	1	7,26
Zambia, Multisectoral National Action Plan on AMR.docx	1	1	7,2
Ethiopia Strategy for the Prevention and Containment of Antimicrobial Resistance.docx	1	1	2,52
Sierra Leone National Strategic Plan for Combating AMR.docx	1	1	4,18
Tanzania National Action Plan on Antimicrobial Resistance.docx	1	1	4,75
Uganda AMR National Action Plan.docx	1	1	3,9
Zambia, Multisectoral National Action Plan on AMR.docx	1	1	3,92
Ethiopia Strategy for the Prevention and Containment of Antimicrobial Resistance.docx	1	1	2,71
Sierra Leone National Strategic Plan for Combating AMR.docx	1	1	3,46
Tanzania National Action Plan on Antimicrobial Resistance.docx	1	1	3,09
Uganda AMR National Action Plan.docx	1	1	4,95
Zambia, Multisectoral National Action Plan on AMR.docx	1	1	4,05
Ethiopia Strategy for the Prevention and Containment of Antimicrobial Resistance.docx	1	1	2,96
Sierra Leone National Strategic Plan for Combating AMR.docx	1	1	6,87
Tanzania National Action Plan on Antimicrobial Resistance.docx	1	1	7,02
Uganda AMR National Action Plan.docx	1	1	5,97
Zambia, Multisectoral National Action Plan on AMR.docx	1	1	7,01
Ethiopia Strategy for the Prevention and Containment of Antimicrobial Resistance.docx	1	1	5,82
Sierra Leone National Strategic Plan for Combating AMR.docx	1	1	7,59
Tanzania National Action Plan on Antimicrobial Resistance.docx	1	1	9,96
Uganda AMR National Action Plan.docx	1	1	9,64
Zambia, Multisectoral National Action Plan on AMR.docx	1	1	10,67
Ethiopia Strategy for the Prevention and Containment of Antimicrobial Resistance.docx	1	1	3,77
Sierra Leone National Strategic Plan for Combating AMR.docx	1	1	8,05
Tanzania National Action Plan on Antimicrobial Resistance.docx	1	1	7,59
Uganda AMR National Action Plan.docx	1	1	6,29
Zambia, Multisectoral National Action Plan on AMR.docx	1	1	7,39
Ethiopia Strategy for the Prevention and Containment of Antimicrobial Resistance.docx	1	1	3,43
Sierra Leone National Strategic Plan for Combating AMR.docx	1	1	5,2
Tanzania National Action Plan on Antimicrobial Resistance.docx	1	1	5,63
Uganda AMR National Action Plan.docx	1	1	5,48
Zambia, Multisectoral National Action Plan on AMR.docx	1	1	5,51
Ethiopia Strategy for the Prevention and Containment of Antimicrobial Resistance.docx	1	1	2,91
Sierra Leone National Strategic Plan for Combating AMR.docx	1	1	8,79
Tanzania National Action Plan on Antimicrobial Resistance.docx	1	1	12,44
Uganda AMR National Action Plan.docx	1	1	6,47
Zambia, Multisectoral National Action Plan on AMR.docx	1	1	11,91
Ethiopia Strategy for the Prevention and Containment of Antimicrobial Resistance.docx	1	1	3,13
Sierra Leone National Strategic Plan for Combating AMR.docx	1	1	5,49
Tanzania National Action Plan on Antimicrobial Resistance.docx	1	1	5,78
Uganda AMR National Action Plan.docx	1	1	5,41
Zambia, Multisectoral National Action Plan on AMR.docx	1	1	6,28
Ethiopia Strategy for the Prevention and Containment of Antimicrobial Resistance.docx	1	1	2,73
Sierra Leone National Strategic Plan for Combating AMR.docx	1	1	4,87
Tanzania National Action Plan on Antimicrobial Resistance.docx	1	1	6,25
Uganda AMR National Action Plan.docx	1	1	5,07
Zambia, Multisectoral National Action Plan on AMR.docx	1	1	5,76
Ethiopia Strategy for the Prevention and Containment of Antimicrobial Resistance.docx	1	1	3,28
Sierra Leone National Strategic Plan for Combating AMR.docx	1	1	4,37
Tanzania National Action Plan on Antimicrobial Resistance.docx	1	1	4,23
Uganda AMR National Action Plan.docx	1	1	5,23
Zambia, Multisectoral National Action Plan on AMR.docx	1	1	4,66
Ethiopia Strategy for the Prevention and Containment of Antimicrobial Resistance.docx	1	1	5,05
Sierra Leone National Strategic Plan for Combating AMR.docx	1	1	9,46
Tanzania National Action Plan on Antimicrobial Resistance.docx	1	1	7,81
Uganda AMR National Action Plan.docx	1	1	9,61
Zambia, Multisectoral National Action Plan on AMR.docx	1	1	7,85
Ethiopia Strategy for the Prevention and Containment of Antimicrobial Resistance.docx	1	1	4,2
Sierra Leone National Strategic Plan for Combating AMR.docx	1	1	4,53
Tanzania National Action Plan on Antimicrobial Resistance.docx	1	1	6,38
Uganda AMR National Action Plan.docx	1	1	7,24
Zambia, Multisectoral National Action Plan on AMR.docx	1	1	5,42
Ethiopia Strategy for the Prevention and Containment of Antimicrobial Resistance.docx	1	1	2,53
Sierra Leone National Strategic Plan for Combating AMR.docx	1	1	4,74
Tanzania National Action Plan on Antimicrobial Resistance.docx	1	1	6,6
Uganda AMR National Action Plan.docx	1	1	4,92
Zambia, Multisectoral National Action Plan on AMR.docx	1	1	5,51
Ethiopia Strategy for the Prevention and Containment of Antimicrobial Resistance.docx	1	1	4,22
Sierra Leone National Strategic Plan for Combating AMR.docx	1	1	8,74
Tanzania National Action Plan on Antimicrobial Resistance.docx	1	1	8,3
Uganda AMR National Action Plan.docx	1	1	6,78
Zambia, Multisectoral National Action Plan on AMR.docx	1	1	6,54
Ethiopia Strategy for the Prevention and Containment of Antimicrobial Resistance.docx	1	1	1,56
Sierra Leone National Strategic Plan for Combating AMR.docx	1	1	2,56
Tanzania National Action Plan on Antimicrobial Resistance.docx	1	1	3,09
Uganda AMR National Action Plan.docx	1	1	3,13
Zambia, Multisectoral National Action Plan on AMR.docx	1	1	2,12
Ethiopia Strategy for the Prevention and Containment of Antimicrobial Resistance.docx	1	1	3,1
Sierra Leone National Strategic Plan for Combating AMR.docx	1	1	5,85
Tanzania National Action Plan on Antimicrobial Resistance.docx	1	1	8,08
Uganda AMR National Action Plan.docx	1	1	7,12
Zambia, Multisectoral National Action Plan on AMR.docx	1	1	6,23
Ethiopia Strategy for the Prevention and Containment of Antimicrobial Resistance.docx	1	1	2,32
Sierra Leone National Strategic Plan for Combating AMR.docx	1	1	3,64
Tanzania National Action Plan on Antimicrobial Resistance.docx	1	1	5,11
Uganda AMR National Action Plan.docx	1	1	4,88
Zambia, Multisectoral National Action Plan on AMR.docx	1	1	5,44
Ethiopia Strategy for the Prevention and Containment of Antimicrobial Resistance.docx	1	1	1,46
Sierra Leone National Strategic Plan for Combating AMR.docx	1	1	2,81
Tanzania National Action Plan on Antimicrobial Resistance.docx	1	1	2,47
Uganda AMR National Action Plan.docx	1	1	3,08
Zambia, Multisectoral National Action Plan on AMR.docx	1	1	2,38
Ethiopia Strategy for the Prevention and Containment of Antimicrobial Resistance.docx	1	1	4,69
Sierra Leone National Strategic Plan for Combating AMR.docx	1	1	8,54
Tanzania National Action Plan on Antimicrobial Resistance.docx	1	1	7,49
Uganda AMR National Action Plan.docx	1	1	7,97
Zambia, Multisectoral National Action Plan on AMR.docx	1	1	6,97
Ethiopia Strategy for the Prevention and Containment of Antimicrobial Resistance.docx	1	1	3,36
Sierra Leone National Strategic Plan for Combating AMR.docx	1	1	6,04
Tanzania National Action Plan on Antimicrobial Resistance.docx	1	1	6,74
Uganda AMR National Action Plan.docx	1	1	6,06
Zambia, Multisectoral National Action Plan on AMR.docx	1	1	6,41
Ethiopia Strategy for the Prevention and Containment of Antimicrobial Resistance.docx	1	1	4,24
Sierra Leone National Strategic Plan for Combating AMR.docx	1	1	6,37
Tanzania National Action Plan on Antimicrobial Resistance.docx	1	1	6,83
Uganda AMR National Action Plan.docx	1	1	6,27
Zambia, Multisectoral National Action Plan on AMR.docx	1	1	6,16
Ethiopia Strategy for the Prevention and Containment of Antimicrobial Resistance.docx	1	1	5,15
Sierra Leone National Strategic Plan for Combating AMR.docx	1	1	12,43
Tanzania National Action Plan on Antimicrobial Resistance.docx	1	1	11,17
Uganda AMR National Action Plan.docx	1	1	7,35
Zambia, Multisectoral National Action Plan on AMR.docx	1	1	12,22
Ethiopia Strategy for the Prevention and Containment of Antimicrobial Resistance.docx	1	1	2,27
Sierra Leone National Strategic Plan for Combating AMR.docx	1	1	4,3
Tanzania National Action Plan on Antimicrobial Resistance.docx	1	1	5,71
Uganda AMR National Action Plan.docx	1	1	6,1
Zambia, Multisectoral National Action Plan on AMR.docx	1	1	5,77
Ethiopia Strategy for the Prevention and Containment of Antimicrobial Resistance.docx	1	1	9,52
Sierra Leone National Strategic Plan for Combating AMR.docx	1	1
Tanzania National Action Plan on Antimicrobial Resistance.docx	1	1	19,75
Uganda AMR National Action Plan.docx	1	1	13,81
Zambia, Multisectoral National Action Plan on AMR.docx	1	1	13,83
Ethiopia Strategy for the Prevention and Containment of Antimicrobial Resistance.docx	1	1	2,92
Sierra Leone National Strategic Plan for Combating AMR.docx	1	1	4,24
Tanzania National Action Plan on Antimicrobial Resistance.docx	1	1	4,34
Uganda AMR National Action Plan.docx	1	1	6,13
Zambia, Multisectoral National Action Plan on AMR.docx	1	1	4,8
Ethiopia Strategy for the Prevention and Containment of Antimicrobial Resistance.docx	1	1	4,01
Sierra Leone National Strategic Plan for Combating AMR.docx	1	1	6,42
Tanzania National Action Plan on Antimicrobial Resistance.docx	1	1	5,29
Uganda AMR National Action Plan.docx	1	1	7,15
Zambia, Multisectoral National Action Plan on AMR.docx	1	1	4,27
Ethiopia Strategy for the Prevention and Containment of Antimicrobial Resistance.docx	1	1	2,18
Sierra Leone National Strategic Plan for Combating AMR.docx	1	1	3,47
Tanzania National Action Plan on Antimicrobial Resistance.docx	1	1	3,4
Uganda AMR National Action Plan.docx	1	1	5,45
Zambia, Multisectoral National Action Plan on AMR.docx	1	1	5,32
Ethiopia Strategy for the Prevention and Containment of Antimicrobial Resistance.docx	1	1	4,64
Sierra Leone National Strategic Plan for Combating AMR.docx	1	1	11,97
Tanzania National Action Plan on Antimicrobial Resistance.docx	1	1	9,2
Uganda AMR National Action Plan.docx	1	1	7,28
Zambia, Multisectoral National Action Plan on AMR.docx	1	1	9,68
Ethiopia Strategy for the Prevention and Containment of Antimicrobial Resistance.docx	1	1	6,07
Sierra Leone National Strategic Plan for Combating AMR.docx	1	1	9,89
Tanzania National Action Plan on Antimicrobial Resistance.docx	1	1	12,35
Uganda AMR National Action Plan.docx	1	1	8,67
Zambia, Multisectoral National Action Plan on AMR.docx	1	1	11,54
Ethiopia Strategy for the Prevention and Containment of Antimicrobial Resistance.docx	1	1	2,68
Sierra Leone National Strategic Plan for Combating AMR.docx	1	1	3,15
Tanzania National Action Plan on Antimicrobial Resistance.docx	1	1	2,8
Uganda AMR National Action Plan.docx	1	1	3,69
Zambia, Multisectoral National Action Plan on AMR.docx	1	1	2,01
Ethiopia Strategy for the Prevention and Containment of Antimicrobial Resistance.docx	1	1	1,41
Sierra Leone National Strategic Plan for Combating AMR.docx	1	1	1,92
Tanzania National Action Plan on Antimicrobial Resistance.docx	1	1	2,65
Uganda AMR National Action Plan.docx	1	1	2,92
Zambia, Multisectoral National Action Plan on AMR.docx	1	1	1,88
Ethiopia Strategy for the Prevention and Containment of Antimicrobial Resistance.docx	1	1	4,35
Sierra Leone National Strategic Plan for Combating AMR.docx	1	1	10,07
Tanzania National Action Plan on Antimicrobial Resistance.docx	1	1	10,1
Uganda AMR National Action Plan.docx	1	1	8,06
Zambia, Multisectoral National Action Plan on AMR.docx	1	1	11,5
Ethiopia Strategy for the Prevention and Containment of Antimicrobial Resistance.docx	1	1	2,99
Sierra Leone National Strategic Plan for Combating AMR.docx	1	1	12,02
Tanzania National Action Plan on Antimicrobial Resistance.docx	1	1
Uganda AMR National Action Plan.docx	1	1	6,15
Zambia, Multisectoral National Action Plan on AMR.docx	1	1	10,23
Ethiopia Strategy for the Prevention and Containment of Antimicrobial Resistance.docx	1	1	2,59
Sierra Leone National Strategic Plan for Combating AMR.docx	1	1	6,01
Tanzania National Action Plan on Antimicrobial Resistance.docx	1	1	5,74
Uganda AMR National Action Plan.docx	1	1	7,85
Zambia, Multisectoral National Action Plan on AMR.docx	1	1	4,44
Ethiopia Strategy for the Prevention and Containment of Antimicrobial Resistance.docx	1	1	2,91
Sierra Leone National Strategic Plan for Combating AMR.docx	1	1	5,53
Tanzania National Action Plan on Antimicrobial Resistance.docx	1	1	7,42
Uganda AMR National Action Plan.docx	1	1	5,41
Zambia, Multisectoral National Action Plan on AMR.docx	1	1	6,39
Ethiopia Strategy for the Prevention and Containment of Antimicrobial Resistance.docx	1	1	4,43
Sierra Leone National Strategic Plan for Combating AMR.docx	1	1	5,78
Tanzania National Action Plan on Antimicrobial Resistance.docx	1	1	5,99
Uganda AMR National Action Plan.docx	1	1	7,09
Zambia, Multisectoral National Action Plan on AMR.docx	1	1	5,44
Ethiopia Strategy for the Prevention and Containment of Antimicrobial Resistance.docx	1	1	5,52
Sierra Leone National Strategic Plan for Combating AMR.docx	1	1	4,05
Tanzania National Action Plan on Antimicrobial Resistance.docx	1	1	3,41
Uganda AMR National Action Plan.docx	1	1
Zambia, Multisectoral National Action Plan on AMR.docx	1	1	3,92
Ethiopia Strategy for the Prevention and Containment of Antimicrobial Resistance.docx	1	1	1,95
Sierra Leone National Strategic Plan for Combating AMR.docx	1	1	1,8
Tanzania National Action Plan on Antimicrobial Resistance.docx	1	1	2,49
Uganda AMR National Action Plan.docx	1	1	3,88
Zambia, Multisectoral National Action Plan on AMR.docx	1	1	2,17
Ethiopia Strategy for the Prevention and Containment of Antimicrobial Resistance.docx	1	1	2,95
Sierra Leone National Strategic Plan for Combating AMR.docx	1	1	4,48
Tanzania National Action Plan on Antimicrobial Resistance.docx	1	1	2,73
Uganda AMR National Action Plan.docx	1	1	3,85
Zambia, Multisectoral National Action Plan on AMR.docx	1	1	1,68
Ethiopia Strategy for the Prevention and Containment of Antimicrobial Resistance.docx	1	1	2,47
Sierra Leone National Strategic Plan for Combating AMR.docx	1	1	5,48
Tanzania National Action Plan on Antimicrobial Resistance.docx	1	1	8,47
Uganda AMR National Action Plan.docx	1	1	5,83
Zambia, Multisectoral National Action Plan on AMR.docx	1	1
Ethiopia Strategy for the Prevention and Containment of Antimicrobial Resistance.docx	1	1	2,53
Sierra Leone National Strategic Plan for Combating AMR.docx	1	1	4,27
Tanzania National Action Plan on Antimicrobial Resistance.docx	1	1	5,63
Uganda AMR National Action Plan.docx	1	1	5,98
Zambia, Multisectoral National Action Plan on AMR.docx	1	1	5,2
Korea Democratic Peoples Republic National Strategic Plan on Antimicrobial Resistance.docx	1	2	6,76
Nepal National Antimicrobial Resistance Containment Action Plan.docx	1	2	7,3
Korea Democratic Peoples Republic National Strategic Plan on Antimicrobial Resistance.docx	1	2	1,61
Nepal National Antimicrobial Resistance Containment Action Plan.docx	1	2	4,33
Korea Democratic Peoples Republic National Strategic Plan on Antimicrobial Resistance.docx	1	2	8,58
Nepal National Antimicrobial Resistance Containment Action Plan.docx	1	2	7,87
Korea Democratic Peoples Republic National Strategic Plan on Antimicrobial Resistance.docx	1	2	4,25
Nepal National Antimicrobial Resistance Containment Action Plan.docx	1	2	7,97
Korea Democratic Peoples Republic National Strategic Plan on Antimicrobial Resistance.docx	1	2	7,76
Nepal National Antimicrobial Resistance Containment Action Plan.docx	1	2	10,25
Korea Democratic Peoples Republic National Strategic Plan on Antimicrobial Resistance.docx	1	2	3,24
Nepal National Antimicrobial Resistance Containment Action Plan.docx	1	2	4,57
Korea Democratic Peoples Republic National Strategic Plan on Antimicrobial Resistance.docx	1	2	2,55
Nepal National Antimicrobial Resistance Containment Action Plan.docx	1	2	4,71
Korea Democratic Peoples Republic National Strategic Plan on Antimicrobial Resistance.docx	1	2	2,66
Nepal National Antimicrobial Resistance Containment Action Plan.docx	1	2	2,95
Korea Democratic Peoples Republic National Strategic Plan on Antimicrobial Resistance.docx	1	2	1,87
Nepal National Antimicrobial Resistance Containment Action Plan.docx	1	2	3,7
Korea Democratic Peoples Republic National Strategic Plan on Antimicrobial Resistance.docx	1	2	4,28
Nepal National Antimicrobial Resistance Containment Action Plan.docx	1	2	5,1
Korea Democratic Peoples Republic National Strategic Plan on Antimicrobial Resistance.docx	1	2	4,75
Nepal National Antimicrobial Resistance Containment Action Plan.docx	1	2	9,48
Korea Democratic Peoples Republic National Strategic Plan on Antimicrobial Resistance.docx	1	2	3,22
Nepal National Antimicrobial Resistance Containment Action Plan.docx	1	2	3,99
Korea Democratic Peoples Republic National Strategic Plan on Antimicrobial Resistance.docx	1	2	,88
Nepal National Antimicrobial Resistance Containment Action Plan.docx	1	2	1,05
Korea Democratic Peoples Republic National Strategic Plan on Antimicrobial Resistance.docx	1	2	1,31
Nepal National Antimicrobial Resistance Containment Action Plan.docx	1	2	1,6
Korea Democratic Peoples Republic National Strategic Plan on Antimicrobial Resistance.docx	1	2	5,28
Nepal National Antimicrobial Resistance Containment Action Plan.docx	1	2	5,79
Korea Democratic Peoples Republic National Strategic Plan on Antimicrobial Resistance.docx	1	2	5,39
Nepal National Antimicrobial Resistance Containment Action Plan.docx	1	2	5,5
Korea Democratic Peoples Republic National Strategic Plan on Antimicrobial Resistance.docx	1	2	5,5
Nepal National Antimicrobial Resistance Containment Action Plan.docx	1	2	5,06
Korea Democratic Peoples Republic National Strategic Plan on Antimicrobial Resistance.docx	1	2	6,19
Nepal National Antimicrobial Resistance Containment Action Plan.docx	1	2	5,64
Korea Democratic Peoples Republic National Strategic Plan on Antimicrobial Resistance.docx	1	2	2,91
Nepal National Antimicrobial Resistance Containment Action Plan.docx	1	2	3,06
Korea Democratic Peoples Republic National Strategic Plan on Antimicrobial Resistance.docx	1	2	2,46
Nepal National Antimicrobial Resistance Containment Action Plan.docx	1	2	2,65
Korea Democratic Peoples Republic National Strategic Plan on Antimicrobial Resistance.docx	1	2	4,83
Nepal National Antimicrobial Resistance Containment Action Plan.docx	1	2	5,13
Korea Democratic Peoples Republic National Strategic Plan on Antimicrobial Resistance.docx	1	2	6,5
Nepal National Antimicrobial Resistance Containment Action Plan.docx	1	2	7,2
Korea Democratic Peoples Republic National Strategic Plan on Antimicrobial Resistance.docx	1	2
Nepal National Antimicrobial Resistance Containment Action Plan.docx	1	2	5,17
Korea Democratic Peoples Republic National Strategic Plan on Antimicrobial Resistance.docx	1	2	4,9
Nepal National Antimicrobial Resistance Containment Action Plan.docx	1	2	3,9
Korea Democratic Peoples Republic National Strategic Plan on Antimicrobial Resistance.docx	1	2	7,62
Nepal National Antimicrobial Resistance Containment Action Plan.docx	1	2	3,18
Korea Democratic Peoples Republic National Strategic Plan on Antimicrobial Resistance.docx	1	2	3,42
Nepal National Antimicrobial Resistance Containment Action Plan.docx	1	2	4,67
Korea Democratic Peoples Republic National Strategic Plan on Antimicrobial Resistance.docx	1	2	3,55
Nepal National Antimicrobial Resistance Containment Action Plan.docx	1	2	3,03
Korea Democratic Peoples Republic National Strategic Plan on Antimicrobial Resistance.docx	1	2	2,43
Nepal National Antimicrobial Resistance Containment Action Plan.docx	1	2	2,83
Korea Democratic Peoples Republic National Strategic Plan on Antimicrobial Resistance.docx	1	2	4,57
Nepal National Antimicrobial Resistance Containment Action Plan.docx	1	2	4,81
Korea Democratic Peoples Republic National Strategic Plan on Antimicrobial Resistance.docx	1	2	5,95
Nepal National Antimicrobial Resistance Containment Action Plan.docx	1	2	5,59
Korea Democratic Peoples Republic National Strategic Plan on Antimicrobial Resistance.docx	1	2	3,59
Nepal National Antimicrobial Resistance Containment Action Plan.docx	1	2	3,54
Korea Democratic Peoples Republic National Strategic Plan on Antimicrobial Resistance.docx	1	2	4,35
Nepal National Antimicrobial Resistance Containment Action Plan.docx	1	2
Korea Democratic Peoples Republic National Strategic Plan on Antimicrobial Resistance.docx	1	2	1,11
Nepal National Antimicrobial Resistance Containment Action Plan.docx	1	2	2,27
Korea Democratic Peoples Republic National Strategic Plan on Antimicrobial Resistance.docx	1	2	2,66
Nepal National Antimicrobial Resistance Containment Action Plan.docx	1	2	7,94
Korea Democratic Peoples Republic National Strategic Plan on Antimicrobial Resistance.docx	1	2	2,01
Nepal National Antimicrobial Resistance Containment Action Plan.docx	1	2	1,7
Korea Democratic Peoples Republic National Strategic Plan on Antimicrobial Resistance.docx	1	2	,96
Nepal National Antimicrobial Resistance Containment Action Plan.docx	1	2	2,26
Korea Democratic Peoples Republic National Strategic Plan on Antimicrobial Resistance.docx	1	2	5,15
Nepal National Antimicrobial Resistance Containment Action Plan.docx	1	2	5,86
Korea Democratic Peoples Republic National Strategic Plan on Antimicrobial Resistance.docx	1	2	4,76
Nepal National Antimicrobial Resistance Containment Action Plan.docx	1	2	4,6
Korea Democratic Peoples Republic National Strategic Plan on Antimicrobial Resistance.docx	1	2	5,16
Nepal National Antimicrobial Resistance Containment Action Plan.docx	1	2	4,82
Korea Democratic Peoples Republic National Strategic Plan on Antimicrobial Resistance.docx	1	2	8,33
Nepal National Antimicrobial Resistance Containment Action Plan.docx	1	2	8,12
Korea Democratic Peoples Republic National Strategic Plan on Antimicrobial Resistance.docx	1	2	2,28
Nepal National Antimicrobial Resistance Containment Action Plan.docx	1	2	3,77
Korea Democratic Peoples Republic National Strategic Plan on Antimicrobial Resistance.docx	1	2	9,92
Nepal National Antimicrobial Resistance Containment Action Plan.docx	1	2	9,9
Korea Democratic Peoples Republic National Strategic Plan on Antimicrobial Resistance.docx	1	2	2,37
Nepal National Antimicrobial Resistance Containment Action Plan.docx	1	2	3,37
Korea Democratic Peoples Republic National Strategic Plan on Antimicrobial Resistance.docx	1	2	2,83
Nepal National Antimicrobial Resistance Containment Action Plan.docx	1	2	3,56
Korea Democratic Peoples Republic National Strategic Plan on Antimicrobial Resistance.docx	1	2	1,24
Nepal National Antimicrobial Resistance Containment Action Plan.docx	1	2	5,15
Korea Democratic Peoples Republic National Strategic Plan on Antimicrobial Resistance.docx	1	2	5,08
Nepal National Antimicrobial Resistance Containment Action Plan.docx	1	2	7,96
Korea Democratic Peoples Republic National Strategic Plan on Antimicrobial Resistance.docx	1	2	7,94
Nepal National Antimicrobial Resistance Containment Action Plan.docx	1	2	7,79
Korea Democratic Peoples Republic National Strategic Plan on Antimicrobial Resistance.docx	1	2	1,42
Nepal National Antimicrobial Resistance Containment Action Plan.docx	1	2	2,62
Korea Democratic Peoples Republic National Strategic Plan on Antimicrobial Resistance.docx	1	2	1,16
Nepal National Antimicrobial Resistance Containment Action Plan.docx	1	2	1,56
Korea Democratic Peoples Republic National Strategic Plan on Antimicrobial Resistance.docx	1	2	8,49
Nepal National Antimicrobial Resistance Containment Action Plan.docx	1	2	5,59
Korea Democratic Peoples Republic National Strategic Plan on Antimicrobial Resistance.docx	1	2	5,89
Nepal National Antimicrobial Resistance Containment Action Plan.docx	1	2	4,68
Korea Democratic Peoples Republic National Strategic Plan on Antimicrobial Resistance.docx	1	2	4,8
Nepal National Antimicrobial Resistance Containment Action Plan.docx	1	2	4,74
Korea Democratic Peoples Republic National Strategic Plan on Antimicrobial Resistance.docx	1	2	4,35
Nepal National Antimicrobial Resistance Containment Action Plan.docx	1	2	3,93
Korea Democratic Peoples Republic National Strategic Plan on Antimicrobial Resistance.docx	1	2	5,34
Nepal National Antimicrobial Resistance Containment Action Plan.docx	1	2	5,86
Korea Democratic Peoples Republic National Strategic Plan on Antimicrobial Resistance.docx	1	2	2,23
Nepal National Antimicrobial Resistance Containment Action Plan.docx	1	2	2,09
Korea Democratic Peoples Republic National Strategic Plan on Antimicrobial Resistance.docx	1	2	1
Nepal National Antimicrobial Resistance Containment Action Plan.docx	1	2	1,31
Korea Democratic Peoples Republic National Strategic Plan on Antimicrobial Resistance.docx	1	2	,63
Nepal National Antimicrobial Resistance Containment Action Plan.docx	1	2	4
Korea Democratic Peoples Republic National Strategic Plan on Antimicrobial Resistance.docx	1	2	4,05
Nepal National Antimicrobial Resistance Containment Action Plan.docx	1	2	3,21
Korea Democratic Peoples Republic National Strategic Plan on Antimicrobial Resistance.docx	1	2	2,2
Nepal National Antimicrobial Resistance Containment Action Plan.docx	1	2	3,17
Afghanistan National Action Plan on AMR.docx	1	5
Afghanistan National Action Plan on AMR.docx	1	5	4,09
Afghanistan National Action Plan on AMR.docx	1	5	20,68
Afghanistan National Action Plan on AMR.docx	1	5	6,81
Afghanistan National Action Plan on AMR.docx	1	5	11,31
Afghanistan National Action Plan on AMR.docx	1	5	4,69
Afghanistan National Action Plan on AMR.docx	1	5	4,89
Afghanistan National Action Plan on AMR.docx	1	5	2,2
Afghanistan National Action Plan on AMR.docx	1	5	3,82
Afghanistan National Action Plan on AMR.docx	1	5	5,06
Afghanistan National Action Plan on AMR.docx	1	5	9,57
Afghanistan National Action Plan on AMR.docx	1	5	3,75
Afghanistan National Action Plan on AMR.docx	1	5	1,78
Afghanistan National Action Plan on AMR.docx	1	5	2,24
Afghanistan National Action Plan on AMR.docx	1	5	50,75
Afghanistan National Action Plan on AMR.docx	1	5	7,65
Afghanistan National Action Plan on AMR.docx	1	5	5,56
Afghanistan National Action Plan on AMR.docx	1	5	8,12
Afghanistan National Action Plan on AMR.docx	1	5	3,91
Afghanistan National Action Plan on AMR.docx	1	5	3,04
Afghanistan National Action Plan on AMR.docx	1	5	7,79
Afghanistan National Action Plan on AMR.docx	1	5	7,31
Afghanistan National Action Plan on AMR.docx	1	5	6,65
Afghanistan National Action Plan on AMR.docx	1	5	5,05
Afghanistan National Action Plan on AMR.docx	1	5	9,19
Afghanistan National Action Plan on AMR.docx	1	5	6,25
Afghanistan National Action Plan on AMR.docx	1	5	5,26
Afghanistan National Action Plan on AMR.docx	1	5	3,41
Afghanistan National Action Plan on AMR.docx	1	5	7,41
Afghanistan National Action Plan on AMR.docx	1	5	6,86
Afghanistan National Action Plan on AMR.docx	1	5	5,43
Afghanistan National Action Plan on AMR.docx	1	5	7,88
Afghanistan National Action Plan on AMR.docx	1	5	1,87
Afghanistan National Action Plan on AMR.docx	1	5	7,02
Afghanistan National Action Plan on AMR.docx	1	5	5,02
Afghanistan National Action Plan on AMR.docx	1	5	2,28
Afghanistan National Action Plan on AMR.docx	1	5	6,53
Afghanistan National Action Plan on AMR.docx	1	5	6,57
Afghanistan National Action Plan on AMR.docx	1	5	5,59
Afghanistan National Action Plan on AMR.docx	1	5	11,25
Afghanistan National Action Plan on AMR.docx	1	5	3,83
Afghanistan National Action Plan on AMR.docx	1	5	13,4
Afghanistan National Action Plan on AMR.docx	1	5	4,42
Afghanistan National Action Plan on AMR.docx	1	5	4,01
Afghanistan National Action Plan on AMR.docx	1	5	2,09
Afghanistan National Action Plan on AMR.docx	1	5	8,29
Afghanistan National Action Plan on AMR.docx	1	5	12,09
Afghanistan National Action Plan on AMR.docx	1	5	2,45
Afghanistan National Action Plan on AMR.docx	1	5	2,17
Afghanistan National Action Plan on AMR.docx	1	5	8,89
Afghanistan National Action Plan on AMR.docx	1	5	8,54
Afghanistan National Action Plan on AMR.docx	1	5	6,22
Afghanistan National Action Plan on AMR.docx	1	5	6,19
Afghanistan National Action Plan on AMR.docx	1	5	5,99
Afghanistan National Action Plan on AMR.docx	1	5	3,05
Afghanistan National Action Plan on AMR.docx	1	5	2,15
Afghanistan National Action Plan on AMR.docx	1	5	2,55
Afghanistan National Action Plan on AMR.docx	1	5	7,87
Afghanistan National Action Plan on AMR.docx	1	5	3,98
Kenya National Action Plan on Prevention and Containment of AMR.docx	2	1	7,48
Nigeria National Action Plan for AMR.docx	2	1	4,92
Zimbabwe One Health AMR National Action Plan.docx	2	1	7,62
Kenya National Action Plan on Prevention and Containment of AMR.docx	2	1	4,25
Nigeria National Action Plan for AMR.docx	2	1	2,15
Zimbabwe One Health AMR National Action Plan.docx	2	1	3,88
Kenya National Action Plan on Prevention and Containment of AMR.docx	2	1	10,94
Nigeria National Action Plan for AMR.docx	2	1	9,35
Zimbabwe One Health AMR National Action Plan.docx	2	1	9,26
Kenya National Action Plan on Prevention and Containment of AMR.docx	2	1	5,07
Nigeria National Action Plan for AMR.docx	2	1	4,54
Zimbabwe One Health AMR National Action Plan.docx	2	1	5,56
Kenya National Action Plan on Prevention and Containment of AMR.docx	2	1	12,68
Nigeria National Action Plan for AMR.docx	2	1	6,8
Zimbabwe One Health AMR National Action Plan.docx	2	1	11,23
Kenya National Action Plan on Prevention and Containment of AMR.docx	2	1	4,35
Nigeria National Action Plan for AMR.docx	2	1	2,99
Zimbabwe One Health AMR National Action Plan.docx	2	1	4,13
Kenya National Action Plan on Prevention and Containment of AMR.docx	2	1	5,32
Nigeria National Action Plan for AMR.docx	2	1	3,93
Zimbabwe One Health AMR National Action Plan.docx	2	1	5,57
Kenya National Action Plan on Prevention and Containment of AMR.docx	2	1	3,27
Nigeria National Action Plan for AMR.docx	2	1	1,78
Zimbabwe One Health AMR National Action Plan.docx	2	1	2,77
Kenya National Action Plan on Prevention and Containment of AMR.docx	2	1	5,23
Nigeria National Action Plan for AMR.docx	2	1	3,11
Zimbabwe One Health AMR National Action Plan.docx	2	1	5,19
Kenya National Action Plan on Prevention and Containment of AMR.docx	2	1	7,02
Nigeria National Action Plan for AMR.docx	2	1	4,91
Zimbabwe One Health AMR National Action Plan.docx	2	1	4,77
Kenya National Action Plan on Prevention and Containment of AMR.docx	2	1	9,7
Nigeria National Action Plan for AMR.docx	2	1	4,25
Zimbabwe One Health AMR National Action Plan.docx	2	1	8,1
Kenya National Action Plan on Prevention and Containment of AMR.docx	2	1	4,62
Nigeria National Action Plan for AMR.docx	2	1	1,81
Zimbabwe One Health AMR National Action Plan.docx	2	1	3,84
Kenya National Action Plan on Prevention and Containment of AMR.docx	2	1	1,9
Nigeria National Action Plan for AMR.docx	2	1	1,16
Zimbabwe One Health AMR National Action Plan.docx	2	1	1,42
Kenya National Action Plan on Prevention and Containment of AMR.docx	2	1	2,86
Nigeria National Action Plan for AMR.docx	2	1	2,06
Zimbabwe One Health AMR National Action Plan.docx	2	1	1,9
Kenya National Action Plan on Prevention and Containment of AMR.docx	2	1	7,33
Nigeria National Action Plan for AMR.docx	2	1	4,17
Zimbabwe One Health AMR National Action Plan.docx	2	1	6,59
Kenya National Action Plan on Prevention and Containment of AMR.docx	2	1	7,41
Nigeria National Action Plan for AMR.docx	2	1	4,99
Zimbabwe One Health AMR National Action Plan.docx	2	1	8,2
Kenya National Action Plan on Prevention and Containment of AMR.docx	2	1	8,47
Nigeria National Action Plan for AMR.docx	2	1	2,85
Zimbabwe One Health AMR National Action Plan.docx	2	1	6,45
Kenya National Action Plan on Prevention and Containment of AMR.docx	2	1	7,83
Nigeria National Action Plan for AMR.docx	2	1	6,4
Zimbabwe One Health AMR National Action Plan.docx	2	1	8,2
Kenya National Action Plan on Prevention and Containment of AMR.docx	2	1	4,32
Nigeria National Action Plan for AMR.docx	2	1	1,87
Zimbabwe One Health AMR National Action Plan.docx	2	1	4,09
Kenya National Action Plan on Prevention and Containment of AMR.docx	2	1	9,81
Nigeria National Action Plan for AMR.docx	2	1	2,02
Zimbabwe One Health AMR National Action Plan.docx	2	1	3,74
Kenya National Action Plan on Prevention and Containment of AMR.docx	2	1	7,1
Nigeria National Action Plan for AMR.docx	2	1	3,16
Zimbabwe One Health AMR National Action Plan.docx	2	1	6,69
Kenya National Action Plan on Prevention and Containment of AMR.docx	2	1
Nigeria National Action Plan for AMR.docx	2	1	4,3
Zimbabwe One Health AMR National Action Plan.docx	2	1	9,26
Kenya National Action Plan on Prevention and Containment of AMR.docx	2	1	5,97
Nigeria National Action Plan for AMR.docx	2	1	4,35
Zimbabwe One Health AMR National Action Plan.docx	2	1	5,17
Kenya National Action Plan on Prevention and Containment of AMR.docx	2	1	4,09
Nigeria National Action Plan for AMR.docx	2	1	4,01
Zimbabwe One Health AMR National Action Plan.docx	2	1	4,7
Kenya National Action Plan on Prevention and Containment of AMR.docx	2	1	6,7
Nigeria National Action Plan for AMR.docx	2	1	6,51
Zimbabwe One Health AMR National Action Plan.docx	2	1	4,84
Kenya National Action Plan on Prevention and Containment of AMR.docx	2	1	7,84
Nigeria National Action Plan for AMR.docx	2	1	3,63
Zimbabwe One Health AMR National Action Plan.docx	2	1	6,21
Kenya National Action Plan on Prevention and Containment of AMR.docx	2	1	4,69
Nigeria National Action Plan for AMR.docx	2	1	3,6
Zimbabwe One Health AMR National Action Plan.docx	2	1	5,01
Kenya National Action Plan on Prevention and Containment of AMR.docx	2	1	4,64
Nigeria National Action Plan for AMR.docx	2	1	2,33
Zimbabwe One Health AMR National Action Plan.docx	2	1	4,08
Kenya National Action Plan on Prevention and Containment of AMR.docx	2	1	7,52
Nigeria National Action Plan for AMR.docx	2	1	6,64
Zimbabwe One Health AMR National Action Plan.docx	2	1	9,93
Kenya National Action Plan on Prevention and Containment of AMR.docx	2	1	5,59
Nigeria National Action Plan for AMR.docx	2	1	4,99
Zimbabwe One Health AMR National Action Plan.docx	2	1	6,55
Kenya National Action Plan on Prevention and Containment of AMR.docx	2	1	4,88
Nigeria National Action Plan for AMR.docx	2	1	3,9
Zimbabwe One Health AMR National Action Plan.docx	2	1	5,14
Kenya National Action Plan on Prevention and Containment of AMR.docx	2	1	9,3
Nigeria National Action Plan for AMR.docx	2	1	2,93
Zimbabwe One Health AMR National Action Plan.docx	2	1	7,26
Kenya National Action Plan on Prevention and Containment of AMR.docx	2	1	2,39
Nigeria National Action Plan for AMR.docx	2	1	1,15
Zimbabwe One Health AMR National Action Plan.docx	2	1	2,71
Kenya National Action Plan on Prevention and Containment of AMR.docx	2	1	8,02
Nigeria National Action Plan for AMR.docx	2	1	4,66
Zimbabwe One Health AMR National Action Plan.docx	2	1	8,02
Kenya National Action Plan on Prevention and Containment of AMR.docx	2	1	2,88
Nigeria National Action Plan for AMR.docx	2	1
Zimbabwe One Health AMR National Action Plan.docx	2	1	3,39
Kenya National Action Plan on Prevention and Containment of AMR.docx	2	1	2,85
Nigeria National Action Plan for AMR.docx	2	1	1,56
Zimbabwe One Health AMR National Action Plan.docx	2	1	2,99
Kenya National Action Plan on Prevention and Containment of AMR.docx	2	1	6,41
Nigeria National Action Plan for AMR.docx	2	1	4,02
Zimbabwe One Health AMR National Action Plan.docx	2	1	6,31
Kenya National Action Plan on Prevention and Containment of AMR.docx	2	1	5,57
Nigeria National Action Plan for AMR.docx	2	1	3,6
Zimbabwe One Health AMR National Action Plan.docx	2	1	5,61
Kenya National Action Plan on Prevention and Containment of AMR.docx	2	1	11,13
Nigeria National Action Plan for AMR.docx	2	1	3,99
Zimbabwe One Health AMR National Action Plan.docx	2	1	4,81
Kenya National Action Plan on Prevention and Containment of AMR.docx	2	1	10,23
Nigeria National Action Plan for AMR.docx	2	1	6,67
Zimbabwe One Health AMR National Action Plan.docx	2	1	8,23
Kenya National Action Plan on Prevention and Containment of AMR.docx	2	1	5,2
Nigeria National Action Plan for AMR.docx	2	1	1,46
Zimbabwe One Health AMR National Action Plan.docx	2	1	4,32
Kenya National Action Plan on Prevention and Containment of AMR.docx	2	1	11,01
Nigeria National Action Plan for AMR.docx	2	1	8,77
Zimbabwe One Health AMR National Action Plan.docx	2	1	10,26
Kenya National Action Plan on Prevention and Containment of AMR.docx	2	1	4,79
Nigeria National Action Plan for AMR.docx	2	1	2,62
Zimbabwe One Health AMR National Action Plan.docx	2	1	5,05
Kenya National Action Plan on Prevention and Containment of AMR.docx	2	1	4,81
Nigeria National Action Plan for AMR.docx	2	1	3,76
Zimbabwe One Health AMR National Action Plan.docx	2	1	6,74
Kenya National Action Plan on Prevention and Containment of AMR.docx	2	1	4,93
Nigeria National Action Plan for AMR.docx	2	1	1,09
Zimbabwe One Health AMR National Action Plan.docx	2	1	4,9
Kenya National Action Plan on Prevention and Containment of AMR.docx	2	1	9,32
Nigeria National Action Plan for AMR.docx	2	1	4,77
Zimbabwe One Health AMR National Action Plan.docx	2	1	8,86
Kenya National Action Plan on Prevention and Containment of AMR.docx	2	1	10,4
Nigeria National Action Plan for AMR.docx	2	1	6,77
Zimbabwe One Health AMR National Action Plan.docx	2	1	9,92
Kenya National Action Plan on Prevention and Containment of AMR.docx	2	1	2,92
Nigeria National Action Plan for AMR.docx	2	1	1,41
Zimbabwe One Health AMR National Action Plan.docx	2	1	2,73
Kenya National Action Plan on Prevention and Containment of AMR.docx	2	1	1,84
Nigeria National Action Plan for AMR.docx	2	1	,85
Zimbabwe One Health AMR National Action Plan.docx	2	1	1,8
Kenya National Action Plan on Prevention and Containment of AMR.docx	2	1	7,06
Nigeria National Action Plan for AMR.docx	2	1	6,68
Zimbabwe One Health AMR National Action Plan.docx	2	1	5,81
Kenya National Action Plan on Prevention and Containment of AMR.docx	2	1	7,55
Nigeria National Action Plan for AMR.docx	2	1	5,44
Zimbabwe One Health AMR National Action Plan.docx	2	1	6,64
Kenya National Action Plan on Prevention and Containment of AMR.docx	2	1	6,38
Nigeria National Action Plan for AMR.docx	2	1	4,28
Zimbabwe One Health AMR National Action Plan.docx	2	1	5
Kenya National Action Plan on Prevention and Containment of AMR.docx	2	1	5,72
Nigeria National Action Plan for AMR.docx	2	1	4,16
Zimbabwe One Health AMR National Action Plan.docx	2	1	6,19
Kenya National Action Plan on Prevention and Containment of AMR.docx	2	1	6,22
Nigeria National Action Plan for AMR.docx	2	1	3,65
Zimbabwe One Health AMR National Action Plan.docx	2	1	5,28
Kenya National Action Plan on Prevention and Containment of AMR.docx	2	1	3,25
Nigeria National Action Plan for AMR.docx	2	1	3,51
Zimbabwe One Health AMR National Action Plan.docx	2	1	3,38
Kenya National Action Plan on Prevention and Containment of AMR.docx	2	1	2,66
Nigeria National Action Plan for AMR.docx	2	1	1,57
Zimbabwe One Health AMR National Action Plan.docx	2	1	2,79
Kenya National Action Plan on Prevention and Containment of AMR.docx	2	1	4,68
Nigeria National Action Plan for AMR.docx	2	1	1,47
Zimbabwe One Health AMR National Action Plan.docx	2	1	2,53
Kenya National Action Plan on Prevention and Containment of AMR.docx	2	1	5,44
Nigeria National Action Plan for AMR.docx	2	1	3,89
Zimbabwe One Health AMR National Action Plan.docx	2	1	5,8
Kenya National Action Plan on Prevention and Containment of AMR.docx	2	1	5,43
Nigeria National Action Plan for AMR.docx	2	1	3,1
Zimbabwe One Health AMR National Action Plan.docx	2	1
Bangladesh Antimicrobial Resistance Containment.docx	2	2	2,1
Bhutan National Action Plan on AMR.docx	2	2	3,98
India National Action Plan on AMR.docx	2	2	66,07
Indonesia National Action Plan on Antimicrobial Resistance.docx	2	2	10,5
Myanmar National Action Plan for Containment of AMR.docx	2	2	8,65
Sri Lanka National Strategic Plan for Combating Antimicrobial Resistance.docx	2	2	6,06
Timor Leste National Action Plan on Antimicrobial Resistance.docx	2	2	8,52
Bangladesh Antimicrobial Resistance Containment.docx	2	2	2,09
Bhutan National Action Plan on AMR.docx	2	2	1,91
India National Action Plan on AMR.docx	2	2	4,59
Indonesia National Action Plan on Antimicrobial Resistance.docx	2	2	3,63
Myanmar National Action Plan for Containment of AMR.docx	2	2	4,17
Sri Lanka National Strategic Plan for Combating Antimicrobial Resistance.docx	2	2	5,32
Timor Leste National Action Plan on Antimicrobial Resistance.docx	2	2	3,7
Bangladesh Antimicrobial Resistance Containment.docx	2	2	2,55
Bhutan National Action Plan on AMR.docx	2	2	4,21
India National Action Plan on AMR.docx	2	2	25,47
Indonesia National Action Plan on Antimicrobial Resistance.docx	2	2	12,69
Myanmar National Action Plan for Containment of AMR.docx	2	2	10,13
Sri Lanka National Strategic Plan for Combating Antimicrobial Resistance.docx	2	2	9,05
Timor Leste National Action Plan on Antimicrobial Resistance.docx	2	2	9,78
Bangladesh Antimicrobial Resistance Containment.docx	2	2
Bhutan National Action Plan on AMR.docx	2	2	3,24
India National Action Plan on AMR.docx	2	2	9,52
Indonesia National Action Plan on Antimicrobial Resistance.docx	2	2	6,43
Myanmar National Action Plan for Containment of AMR.docx	2	2	6,04
Sri Lanka National Strategic Plan for Combating Antimicrobial Resistance.docx	2	2	8,21
Timor Leste National Action Plan on Antimicrobial Resistance.docx	2	2	5,65
Bangladesh Antimicrobial Resistance Containment.docx	2	2	2,19
Bhutan National Action Plan on AMR.docx	2	2	5,1
India National Action Plan on AMR.docx	2	2	10,86
Indonesia National Action Plan on Antimicrobial Resistance.docx	2	2	13,34
Myanmar National Action Plan for Containment of AMR.docx	2	2	10,13
Sri Lanka National Strategic Plan for Combating Antimicrobial Resistance.docx	2	2	8,84
Timor Leste National Action Plan on Antimicrobial Resistance.docx	2	2	10,01
Bangladesh Antimicrobial Resistance Containment.docx	2	2	1,52
Bhutan National Action Plan on AMR.docx	2	2
India National Action Plan on AMR.docx	2	2	5,82
Indonesia National Action Plan on Antimicrobial Resistance.docx	2	2	4,64
Myanmar National Action Plan for Containment of AMR.docx	2	2	4,3
Sri Lanka National Strategic Plan for Combating Antimicrobial Resistance.docx	2	2	4,81
Timor Leste National Action Plan on Antimicrobial Resistance.docx	2	2	3,44
Bangladesh Antimicrobial Resistance Containment.docx	2	2	2,48
Bhutan National Action Plan on AMR.docx	2	2	2,55
India National Action Plan on AMR.docx	2	2	5,29
Indonesia National Action Plan on Antimicrobial Resistance.docx	2	2	5,38
Myanmar National Action Plan for Containment of AMR.docx	2	2	5,9
Sri Lanka National Strategic Plan for Combating Antimicrobial Resistance.docx	2	2	5,01
Timor Leste National Action Plan on Antimicrobial Resistance.docx	2	2	5,43
Bangladesh Antimicrobial Resistance Containment.docx	2	2	,89
Bhutan National Action Plan on AMR.docx	2	2	2,91
India National Action Plan on AMR.docx	2	2	3,94
Indonesia National Action Plan on Antimicrobial Resistance.docx	2	2	2,84
Myanmar National Action Plan for Containment of AMR.docx	2	2	3,66
Sri Lanka National Strategic Plan for Combating Antimicrobial Resistance.docx	2	2	3,91
Timor Leste National Action Plan on Antimicrobial Resistance.docx	2	2	2,77
Bangladesh Antimicrobial Resistance Containment.docx	2	2	,5
Bhutan National Action Plan on AMR.docx	2	2	,33
India National Action Plan on AMR.docx	2	2	5,77
Indonesia National Action Plan on Antimicrobial Resistance.docx	2	2	3,9
Myanmar National Action Plan for Containment of AMR.docx	2	2	4,11
Sri Lanka National Strategic Plan for Combating Antimicrobial Resistance.docx	2	2	3,7
Timor Leste National Action Plan on Antimicrobial Resistance.docx	2	2	3,28
Bangladesh Antimicrobial Resistance Containment.docx	2	2	2,62
Bhutan National Action Plan on AMR.docx	2	2	4,16
India National Action Plan on AMR.docx	2	2	5,47
Indonesia National Action Plan on Antimicrobial Resistance.docx	2	2	6,65
Myanmar National Action Plan for Containment of AMR.docx	2	2	6,42
Sri Lanka National Strategic Plan for Combating Antimicrobial Resistance.docx	2	2	4,86
Timor Leste National Action Plan on Antimicrobial Resistance.docx	2	2	5,65
Bangladesh Antimicrobial Resistance Containment.docx	2	2	2,31
Bhutan National Action Plan on AMR.docx	2	2	4,47
India National Action Plan on AMR.docx	2	2	11,1
Indonesia National Action Plan on Antimicrobial Resistance.docx	2	2	9,76
Myanmar National Action Plan for Containment of AMR.docx	2	2	10,26
Sri Lanka National Strategic Plan for Combating Antimicrobial Resistance.docx	2	2	9,35
Timor Leste National Action Plan on Antimicrobial Resistance.docx	2	2	8,29
Bangladesh Antimicrobial Resistance Containment.docx	2	2	1,23
Bhutan National Action Plan on AMR.docx	2	2	2,96
India National Action Plan on AMR.docx	2	2	4,88
Indonesia National Action Plan on Antimicrobial Resistance.docx	2	2	4,85
Myanmar National Action Plan for Containment of AMR.docx	2	2	4,64
Sri Lanka National Strategic Plan for Combating Antimicrobial Resistance.docx	2	2	5,78
Timor Leste National Action Plan on Antimicrobial Resistance.docx	2	2	4,41
Bangladesh Antimicrobial Resistance Containment.docx	2	2	,4
Bhutan National Action Plan on AMR.docx	2	2	,56
India National Action Plan on AMR.docx	2	2	2
Indonesia National Action Plan on Antimicrobial Resistance.docx	2	2	2,26
Myanmar National Action Plan for Containment of AMR.docx	2	2	2,03
Sri Lanka National Strategic Plan for Combating Antimicrobial Resistance.docx	2	2	1,66
Timor Leste National Action Plan on Antimicrobial Resistance.docx	2	2	1,98
Bangladesh Antimicrobial Resistance Containment.docx	2	2	,58
Bhutan National Action Plan on AMR.docx	2	2	,51
India National Action Plan on AMR.docx	2	2	2,96
Indonesia National Action Plan on Antimicrobial Resistance.docx	2	2	2,74
Myanmar National Action Plan for Containment of AMR.docx	2	2	2,67
Sri Lanka National Strategic Plan for Combating Antimicrobial Resistance.docx	2	2	2,3
Timor Leste National Action Plan on Antimicrobial Resistance.docx	2	2	2,36
Bangladesh Antimicrobial Resistance Containment.docx	2	2	2,61
Bhutan National Action Plan on AMR.docx	2	2	3,62
India National Action Plan on AMR.docx	2	2
Indonesia National Action Plan on Antimicrobial Resistance.docx	2	2	8,66
Myanmar National Action Plan for Containment of AMR.docx	2	2	7,96
Sri Lanka National Strategic Plan for Combating Antimicrobial Resistance.docx	2	2	6,35
Timor Leste National Action Plan on Antimicrobial Resistance.docx	2	2	7,46
Bangladesh Antimicrobial Resistance Containment.docx	2	2	2,33
Bhutan National Action Plan on AMR.docx	2	2	2,6
India National Action Plan on AMR.docx	2	2	8,98
Indonesia National Action Plan on Antimicrobial Resistance.docx	2	2
Myanmar National Action Plan for Containment of AMR.docx	2	2	58,75
Sri Lanka National Strategic Plan for Combating Antimicrobial Resistance.docx	2	2	7,29
Timor Leste National Action Plan on Antimicrobial Resistance.docx	2	2	57,09
Bangladesh Antimicrobial Resistance Containment.docx	2	2	2,38
Bhutan National Action Plan on AMR.docx	2	2	3,42
India National Action Plan on AMR.docx	2	2	8,09
Indonesia National Action Plan on Antimicrobial Resistance.docx	2	2	7,38
Myanmar National Action Plan for Containment of AMR.docx	2	2	6,17
Sri Lanka National Strategic Plan for Combating Antimicrobial Resistance.docx	2	2	6,54
Timor Leste National Action Plan on Antimicrobial Resistance.docx	2	2	4,85
Bangladesh Antimicrobial Resistance Containment.docx	2	2	2,91
Bhutan National Action Plan on AMR.docx	2	2	4,11
India National Action Plan on AMR.docx	2	2	8,75
Indonesia National Action Plan on Antimicrobial Resistance.docx	2	2	8,31
Myanmar National Action Plan for Containment of AMR.docx	2	2	6,92
Sri Lanka National Strategic Plan for Combating Antimicrobial Resistance.docx	2	2	7,49
Timor Leste National Action Plan on Antimicrobial Resistance.docx	2	2	6,44
Bangladesh Antimicrobial Resistance Containment.docx	2	2	1,04
Bhutan National Action Plan on AMR.docx	2	2	1,94
India National Action Plan on AMR.docx	2	2	4,66
Indonesia National Action Plan on Antimicrobial Resistance.docx	2	2	4,23
Myanmar National Action Plan for Containment of AMR.docx	2	2	4,35
Sri Lanka National Strategic Plan for Combating Antimicrobial Resistance.docx	2	2	3,85
Timor Leste National Action Plan on Antimicrobial Resistance.docx	2	2	3,79
Bangladesh Antimicrobial Resistance Containment.docx	2	2	1,28
Bhutan National Action Plan on AMR.docx	2	2	1,58
India National Action Plan on AMR.docx	2	2	3,88
Indonesia National Action Plan on Antimicrobial Resistance.docx	2	2	3,05
Myanmar National Action Plan for Containment of AMR.docx	2	2	3,58
Sri Lanka National Strategic Plan for Combating Antimicrobial Resistance.docx	2	2	3,49
Timor Leste National Action Plan on Antimicrobial Resistance.docx	2	2	2,95
Bangladesh Antimicrobial Resistance Containment.docx	2	2	1,49
Bhutan National Action Plan on AMR.docx	2	2	2,58
India National Action Plan on AMR.docx	2	2	8,47
Indonesia National Action Plan on Antimicrobial Resistance.docx	2	2	10,61
Myanmar National Action Plan for Containment of AMR.docx	2	2	10,44
Sri Lanka National Strategic Plan for Combating Antimicrobial Resistance.docx	2	2	5,65
Timor Leste National Action Plan on Antimicrobial Resistance.docx	2	2	11,08
Bangladesh Antimicrobial Resistance Containment.docx	2	2	2,45
Bhutan National Action Plan on AMR.docx	2	2	5,5
India National Action Plan on AMR.docx	2	2	9,61
Indonesia National Action Plan on Antimicrobial Resistance.docx	2	2	9,61
Myanmar National Action Plan for Containment of AMR.docx	2	2	9,87
Sri Lanka National Strategic Plan for Combating Antimicrobial Resistance.docx	2	2	6,91
Timor Leste National Action Plan on Antimicrobial Resistance.docx	2	2	9,06
Bangladesh Antimicrobial Resistance Containment.docx	2	2	1,11
Bhutan National Action Plan on AMR.docx	2	2	3,26
India National Action Plan on AMR.docx	2	2	7,67
Indonesia National Action Plan on Antimicrobial Resistance.docx	2	2	8,08
Myanmar National Action Plan for Containment of AMR.docx	2	2	6,09
Sri Lanka National Strategic Plan for Combating Antimicrobial Resistance.docx	2	2	3,61
Timor Leste National Action Plan on Antimicrobial Resistance.docx	2	2	5,48
Bangladesh Antimicrobial Resistance Containment.docx	2	2	,26
Bhutan National Action Plan on AMR.docx	2	2	3,92
India National Action Plan on AMR.docx	2	2	4,67
Indonesia National Action Plan on Antimicrobial Resistance.docx	2	2	4,47
Myanmar National Action Plan for Containment of AMR.docx	2	2	1,46
Sri Lanka National Strategic Plan for Combating Antimicrobial Resistance.docx	2	2	,79
Timor Leste National Action Plan on Antimicrobial Resistance.docx	2	2	,99
Bangladesh Antimicrobial Resistance Containment.docx	2	2	1,46
Bhutan National Action Plan on AMR.docx	2	2	3,26
India National Action Plan on AMR.docx	2	2	11,73
Indonesia National Action Plan on Antimicrobial Resistance.docx	2	2	7,97
Myanmar National Action Plan for Containment of AMR.docx	2	2	6,01
Sri Lanka National Strategic Plan for Combating Antimicrobial Resistance.docx	2	2	4,23
Timor Leste National Action Plan on Antimicrobial Resistance.docx	2	2	5,89
Bangladesh Antimicrobial Resistance Containment.docx	2	2	2,39
Bhutan National Action Plan on AMR.docx	2	2	2,46
India National Action Plan on AMR.docx	2	2	6,36
Indonesia National Action Plan on Antimicrobial Resistance.docx	2	2	5,91
Myanmar National Action Plan for Containment of AMR.docx	2	2	5,42
Sri Lanka National Strategic Plan for Combating Antimicrobial Resistance.docx	2	2	6,78
Timor Leste National Action Plan on Antimicrobial Resistance.docx	2	2	5,55
Bangladesh Antimicrobial Resistance Containment.docx	2	2	1,47
Bhutan National Action Plan on AMR.docx	2	2	1,89
India National Action Plan on AMR.docx	2	2	6,3
Indonesia National Action Plan on Antimicrobial Resistance.docx	2	2	37,4
Myanmar National Action Plan for Containment of AMR.docx	2	2	59
Sri Lanka National Strategic Plan for Combating Antimicrobial Resistance.docx	2	2	4,79
Timor Leste National Action Plan on Antimicrobial Resistance.docx	2	2	50,87
Bangladesh Antimicrobial Resistance Containment.docx	2	2	1,94
Bhutan National Action Plan on AMR.docx	2	2	1,36
India National Action Plan on AMR.docx	2	2	4,43
Indonesia National Action Plan on Antimicrobial Resistance.docx	2	2	3,76
Myanmar National Action Plan for Containment of AMR.docx	2	2	3,95
Sri Lanka National Strategic Plan for Combating Antimicrobial Resistance.docx	2	2	4,24
Timor Leste National Action Plan on Antimicrobial Resistance.docx	2	2	3,16
Bangladesh Antimicrobial Resistance Containment.docx	2	2	2,24
Bhutan National Action Plan on AMR.docx	2	2	4,18
India National Action Plan on AMR.docx	2	2	8,07
Indonesia National Action Plan on Antimicrobial Resistance.docx	2	2	7,94
Myanmar National Action Plan for Containment of AMR.docx	2	2	8,35
Sri Lanka National Strategic Plan for Combating Antimicrobial Resistance.docx	2	2	6,97
Timor Leste National Action Plan on Antimicrobial Resistance.docx	2	2	7,06
Bangladesh Antimicrobial Resistance Containment.docx	2	2	2,13
Bhutan National Action Plan on AMR.docx	2	2	5,95
India National Action Plan on AMR.docx	2	2	7
Indonesia National Action Plan on Antimicrobial Resistance.docx	2	2	8,56
Myanmar National Action Plan for Containment of AMR.docx	2	2	5,85
Sri Lanka National Strategic Plan for Combating Antimicrobial Resistance.docx	2	2	5,73
Timor Leste National Action Plan on Antimicrobial Resistance.docx	2	2	5,9
Bangladesh Antimicrobial Resistance Containment.docx	2	2	1,67
Bhutan National Action Plan on AMR.docx	2	2	2,24
India National Action Plan on AMR.docx	2	2	6,08
Indonesia National Action Plan on Antimicrobial Resistance.docx	2	2	46,06
Myanmar National Action Plan for Containment of AMR.docx	2	2
Sri Lanka National Strategic Plan for Combating Antimicrobial Resistance.docx	2	2	4,74
Timor Leste National Action Plan on Antimicrobial Resistance.docx	2	2	57,92
Bangladesh Antimicrobial Resistance Containment.docx	2	2	3,12
Bhutan National Action Plan on AMR.docx	2	2	4,13
India National Action Plan on AMR.docx	2	2	7,96
Indonesia National Action Plan on Antimicrobial Resistance.docx	2	2	7,46
Myanmar National Action Plan for Containment of AMR.docx	2	2	6,6
Sri Lanka National Strategic Plan for Combating Antimicrobial Resistance.docx	2	2	7,8
Timor Leste National Action Plan on Antimicrobial Resistance.docx	2	2	6,71
Bangladesh Antimicrobial Resistance Containment.docx	2	2	,64
Bhutan National Action Plan on AMR.docx	2	2	,71
India National Action Plan on AMR.docx	2	2	2,65
Indonesia National Action Plan on Antimicrobial Resistance.docx	2	2	2,36
Myanmar National Action Plan for Containment of AMR.docx	2	2	2,37
Sri Lanka National Strategic Plan for Combating Antimicrobial Resistance.docx	2	2	2,39
Timor Leste National Action Plan on Antimicrobial Resistance.docx	2	2	2,22
Bangladesh Antimicrobial Resistance Containment.docx	2	2	4,56
Bhutan National Action Plan on AMR.docx	2	2	5,7
India National Action Plan on AMR.docx	2	2	8,22
Indonesia National Action Plan on Antimicrobial Resistance.docx	2	2	8,63
Myanmar National Action Plan for Containment of AMR.docx	2	2	8,05
Sri Lanka National Strategic Plan for Combating Antimicrobial Resistance.docx	2	2	6
Timor Leste National Action Plan on Antimicrobial Resistance.docx	2	2	7,62
Bangladesh Antimicrobial Resistance Containment.docx	2	2	1,21
Bhutan National Action Plan on AMR.docx	2	2	1,17
India National Action Plan on AMR.docx	2	2	5,49
Indonesia National Action Plan on Antimicrobial Resistance.docx	2	2	3,56
Myanmar National Action Plan for Containment of AMR.docx	2	2	3,55
Sri Lanka National Strategic Plan for Combating Antimicrobial Resistance.docx	2	2	2,36
Timor Leste National Action Plan on Antimicrobial Resistance.docx	2	2	3,33
Bangladesh Antimicrobial Resistance Containment.docx	2	2	1
Bhutan National Action Plan on AMR.docx	2	2	,64
India National Action Plan on AMR.docx	2	2	2,86
Indonesia National Action Plan on Antimicrobial Resistance.docx	2	2	2,77
Myanmar National Action Plan for Containment of AMR.docx	2	2	2,71
Sri Lanka National Strategic Plan for Combating Antimicrobial Resistance.docx	2	2	2,84
Timor Leste National Action Plan on Antimicrobial Resistance.docx	2	2	2,15
Bangladesh Antimicrobial Resistance Containment.docx	2	2	3,03
Bhutan National Action Plan on AMR.docx	2	2	4,14
India National Action Plan on AMR.docx	2	2	8,23
Indonesia National Action Plan on Antimicrobial Resistance.docx	2	2	6,08
Myanmar National Action Plan for Containment of AMR.docx	2	2	5,63
Sri Lanka National Strategic Plan for Combating Antimicrobial Resistance.docx	2	2	8,23
Timor Leste National Action Plan on Antimicrobial Resistance.docx	2	2	5,21
Bangladesh Antimicrobial Resistance Containment.docx	2	2	1,2
Bhutan National Action Plan on AMR.docx	2	2	2,48
India National Action Plan on AMR.docx	2	2	6,7
Indonesia National Action Plan on Antimicrobial Resistance.docx	2	2	6,14
Myanmar National Action Plan for Containment of AMR.docx	2	2	5,43
Sri Lanka National Strategic Plan for Combating Antimicrobial Resistance.docx	2	2	5
Timor Leste National Action Plan on Antimicrobial Resistance.docx	2	2	5,06
Bangladesh Antimicrobial Resistance Containment.docx	2	2	1,3
Bhutan National Action Plan on AMR.docx	2	2	3,84
India National Action Plan on AMR.docx	2	2	5,53
Indonesia National Action Plan on Antimicrobial Resistance.docx	2	2	4,18
Myanmar National Action Plan for Containment of AMR.docx	2	2	2,32
Sri Lanka National Strategic Plan for Combating Antimicrobial Resistance.docx	2	2	4
Timor Leste National Action Plan on Antimicrobial Resistance.docx	2	2	2,28
Bangladesh Antimicrobial Resistance Containment.docx	2	2	1,62
Bhutan National Action Plan on AMR.docx	2	2	3,55
India National Action Plan on AMR.docx	2	2	11,5
Indonesia National Action Plan on Antimicrobial Resistance.docx	2	2	11,12
Myanmar National Action Plan for Containment of AMR.docx	2	2	9,51
Sri Lanka National Strategic Plan for Combating Antimicrobial Resistance.docx	2	2	6,89
Timor Leste National Action Plan on Antimicrobial Resistance.docx	2	2	8,93
Bangladesh Antimicrobial Resistance Containment.docx	2	2	,7
Bhutan National Action Plan on AMR.docx	2	2	1,57
India National Action Plan on AMR.docx	2	2	3,96
Indonesia National Action Plan on Antimicrobial Resistance.docx	2	2	4,56
Myanmar National Action Plan for Containment of AMR.docx	2	2	4,24
Sri Lanka National Strategic Plan for Combating Antimicrobial Resistance.docx	2	2	4,64
Timor Leste National Action Plan on Antimicrobial Resistance.docx	2	2	3,77
Bangladesh Antimicrobial Resistance Containment.docx	2	2	2,07
Bhutan National Action Plan on AMR.docx	2	2	6,52
India National Action Plan on AMR.docx	2	2	16,1
Indonesia National Action Plan on Antimicrobial Resistance.docx	2	2	12,13
Myanmar National Action Plan for Containment of AMR.docx	2	2	6,86
Sri Lanka National Strategic Plan for Combating Antimicrobial Resistance.docx	2	2	7,4
Timor Leste National Action Plan on Antimicrobial Resistance.docx	2	2	6,39
Bangladesh Antimicrobial Resistance Containment.docx	2	2	1,6
Bhutan National Action Plan on AMR.docx	2	2	1,41
India National Action Plan on AMR.docx	2	2	5,3
Indonesia National Action Plan on Antimicrobial Resistance.docx	2	2	4,73
Myanmar National Action Plan for Containment of AMR.docx	2	2	4,98
Sri Lanka National Strategic Plan for Combating Antimicrobial Resistance.docx	2	2	5,12
Timor Leste National Action Plan on Antimicrobial Resistance.docx	2	2	5,18
Bangladesh Antimicrobial Resistance Containment.docx	2	2	2,07
Bhutan National Action Plan on AMR.docx	2	2	2,8
India National Action Plan on AMR.docx	2	2	5,27
Indonesia National Action Plan on Antimicrobial Resistance.docx	2	2	4,89
Myanmar National Action Plan for Containment of AMR.docx	2	2	5,14
Sri Lanka National Strategic Plan for Combating Antimicrobial Resistance.docx	2	2	5,34
Timor Leste National Action Plan on Antimicrobial Resistance.docx	2	2	4,49
Bangladesh Antimicrobial Resistance Containment.docx	2	2	,55
Bhutan National Action Plan on AMR.docx	2	2	1,91
India National Action Plan on AMR.docx	2	2	2,72
Indonesia National Action Plan on Antimicrobial Resistance.docx	2	2	2,83
Myanmar National Action Plan for Containment of AMR.docx	2	2	2,78
Sri Lanka National Strategic Plan for Combating Antimicrobial Resistance.docx	2	2	3,87
Timor Leste National Action Plan on Antimicrobial Resistance.docx	2	2	2,42
Bangladesh Antimicrobial Resistance Containment.docx	2	2	3,67
Bhutan National Action Plan on AMR.docx	2	2	3,79
India National Action Plan on AMR.docx	2	2	9,82
Indonesia National Action Plan on Antimicrobial Resistance.docx	2	2	10,09
Myanmar National Action Plan for Containment of AMR.docx	2	2	9,24
Sri Lanka National Strategic Plan for Combating Antimicrobial Resistance.docx	2	2
Timor Leste National Action Plan on Antimicrobial Resistance.docx	2	2	8,4
Bangladesh Antimicrobial Resistance Containment.docx	2	2	1,94
Bhutan National Action Plan on AMR.docx	2	2	4,84
India National Action Plan on AMR.docx	2	2	13,8
Indonesia National Action Plan on Antimicrobial Resistance.docx	2	2	10,32
Myanmar National Action Plan for Containment of AMR.docx	2	2	8,66
Sri Lanka National Strategic Plan for Combating Antimicrobial Resistance.docx	2	2	7,4
Timor Leste National Action Plan on Antimicrobial Resistance.docx	2	2	8,38
Bangladesh Antimicrobial Resistance Containment.docx	2	2	1,03
Bhutan National Action Plan on AMR.docx	2	2	,9
India National Action Plan on AMR.docx	2	2	3,61
Indonesia National Action Plan on Antimicrobial Resistance.docx	2	2	3,54
Myanmar National Action Plan for Containment of AMR.docx	2	2	3,57
Sri Lanka National Strategic Plan for Combating Antimicrobial Resistance.docx	2	2	3,22
Timor Leste National Action Plan on Antimicrobial Resistance.docx	2	2	3,45
Bangladesh Antimicrobial Resistance Containment.docx	2	2	,74
Bhutan National Action Plan on AMR.docx	2	2	,42
India National Action Plan on AMR.docx	2	2	2,69
Indonesia National Action Plan on Antimicrobial Resistance.docx	2	2	2,14
Myanmar National Action Plan for Containment of AMR.docx	2	2	2,53
Sri Lanka National Strategic Plan for Combating Antimicrobial Resistance.docx	2	2	2,01
Timor Leste National Action Plan on Antimicrobial Resistance.docx	2	2	1,96
Bangladesh Antimicrobial Resistance Containment.docx	2	2	1,82
Bhutan National Action Plan on AMR.docx	2	2	3,3
India National Action Plan on AMR.docx	2	2	10,69
Indonesia National Action Plan on Antimicrobial Resistance.docx	2	2	8,41
Myanmar National Action Plan for Containment of AMR.docx	2	2	6,97
Sri Lanka National Strategic Plan for Combating Antimicrobial Resistance.docx	2	2	6,28
Timor Leste National Action Plan on Antimicrobial Resistance.docx	2	2	5,81
Bangladesh Antimicrobial Resistance Containment.docx	2	2	1,94
Bhutan National Action Plan on AMR.docx	2	2	2,65
India National Action Plan on AMR.docx	2	2	8,24
Indonesia National Action Plan on Antimicrobial Resistance.docx	2	2	7,99
Myanmar National Action Plan for Containment of AMR.docx	2	2	7,7
Sri Lanka National Strategic Plan for Combating Antimicrobial Resistance.docx	2	2	5,48
Timor Leste National Action Plan on Antimicrobial Resistance.docx	2	2	7,1
Bangladesh Antimicrobial Resistance Containment.docx	2	2	,7
Bhutan National Action Plan on AMR.docx	2	2	3,38
India National Action Plan on AMR.docx	2	2	6,51
Indonesia National Action Plan on Antimicrobial Resistance.docx	2	2	6,3
Myanmar National Action Plan for Containment of AMR.docx	2	2	6,27
Sri Lanka National Strategic Plan for Combating Antimicrobial Resistance.docx	2	2	7,36
Timor Leste National Action Plan on Antimicrobial Resistance.docx	2	2	5,77
Bangladesh Antimicrobial Resistance Containment.docx	2	2	1,58
Bhutan National Action Plan on AMR.docx	2	2	2,27
India National Action Plan on AMR.docx	2	2	7,33
Indonesia National Action Plan on Antimicrobial Resistance.docx	2	2	53,64
Myanmar National Action Plan for Containment of AMR.docx	2	2	69,59
Sri Lanka National Strategic Plan for Combating Antimicrobial Resistance.docx	2	2	5,52
Timor Leste National Action Plan on Antimicrobial Resistance.docx	2	2
Bangladesh Antimicrobial Resistance Containment.docx	2	2	3,75
Bhutan National Action Plan on AMR.docx	2	2	4,64
India National Action Plan on AMR.docx	2	2	7,14
Indonesia National Action Plan on Antimicrobial Resistance.docx	2	2	6,06
Myanmar National Action Plan for Containment of AMR.docx	2	2	5,35
Sri Lanka National Strategic Plan for Combating Antimicrobial Resistance.docx	2	2	6,35
Timor Leste National Action Plan on Antimicrobial Resistance.docx	2	2	4,23
Bangladesh Antimicrobial Resistance Containment.docx	2	2	1
Bhutan National Action Plan on AMR.docx	2	2	1,2
India National Action Plan on AMR.docx	2	2	3,23
Indonesia National Action Plan on Antimicrobial Resistance.docx	2	2	3,07
Myanmar National Action Plan for Containment of AMR.docx	2	2	2,92
Sri Lanka National Strategic Plan for Combating Antimicrobial Resistance.docx	2	2	2,65
Timor Leste National Action Plan on Antimicrobial Resistance.docx	2	2	2,95
Bangladesh Antimicrobial Resistance Containment.docx	2	2	,83
Bhutan National Action Plan on AMR.docx	2	2	,97
India National Action Plan on AMR.docx	2	2	2,77
Indonesia National Action Plan on Antimicrobial Resistance.docx	2	2	2,51
Myanmar National Action Plan for Containment of AMR.docx	2	2	2,54
Sri Lanka National Strategic Plan for Combating Antimicrobial Resistance.docx	2	2	2,16
Timor Leste National Action Plan on Antimicrobial Resistance.docx	2	2	2,39
Bangladesh Antimicrobial Resistance Containment.docx	2	2	1,07
Bhutan National Action Plan on AMR.docx	2	2	,91
India National Action Plan on AMR.docx	2	2	3,33
Indonesia National Action Plan on Antimicrobial Resistance.docx	2	2	2,15
Myanmar National Action Plan for Containment of AMR.docx	2	2	2,26
Sri Lanka National Strategic Plan for Combating Antimicrobial Resistance.docx	2	2	2,54
Timor Leste National Action Plan on Antimicrobial Resistance.docx	2	2	1,92
Bangladesh Antimicrobial Resistance Containment.docx	2	2	1,13
Bhutan National Action Plan on AMR.docx	2	2	2,47
India National Action Plan on AMR.docx	2	2	8,74
Indonesia National Action Plan on Antimicrobial Resistance.docx	2	2	6,41
Myanmar National Action Plan for Containment of AMR.docx	2	2	5,45
Sri Lanka National Strategic Plan for Combating Antimicrobial Resistance.docx	2	2	4,89
Timor Leste National Action Plan on Antimicrobial Resistance.docx	2	2	4,97
Bangladesh Antimicrobial Resistance Containment.docx	2	2	1,33
Bhutan National Action Plan on AMR.docx	2	2	2,1
India National Action Plan on AMR.docx	2	2	4,74
Indonesia National Action Plan on Antimicrobial Resistance.docx	2	2	6
Myanmar National Action Plan for Containment of AMR.docx	2	2	5,43
Sri Lanka National Strategic Plan for Combating Antimicrobial Resistance.docx	2	2	4,06
Timor Leste National Action Plan on Antimicrobial Resistance.docx	2	2	5,44
Mongolia National Multi sectoral Action Plan on Combatting AMR.docx	2	3	4,18
Phillippines Action Plan to Combat AMR One Healh Approach.docx	2	3	5,36
Mongolia National Multi sectoral Action Plan on Combatting AMR.docx	2	3	1,82
Phillippines Action Plan to Combat AMR One Healh Approach.docx	2	3	2,92
Mongolia National Multi sectoral Action Plan on Combatting AMR.docx	2	3	4,44
Phillippines Action Plan to Combat AMR One Healh Approach.docx	2	3	5,8
Mongolia National Multi sectoral Action Plan on Combatting AMR.docx	2	3	3,48
Phillippines Action Plan to Combat AMR One Healh Approach.docx	2	3	5,51
Mongolia National Multi sectoral Action Plan on Combatting AMR.docx	2	3	5,32
Phillippines Action Plan to Combat AMR One Healh Approach.docx	2	3	7,36
Mongolia National Multi sectoral Action Plan on Combatting AMR.docx	2	3	2,55
Phillippines Action Plan to Combat AMR One Healh Approach.docx	2	3	3,95
Mongolia National Multi sectoral Action Plan on Combatting AMR.docx	2	3	2,56
Phillippines Action Plan to Combat AMR One Healh Approach.docx	2	3	4,05
Mongolia National Multi sectoral Action Plan on Combatting AMR.docx	2	3	2,7
Phillippines Action Plan to Combat AMR One Healh Approach.docx	2	3	2,59
Mongolia National Multi sectoral Action Plan on Combatting AMR.docx	2	3	,83
Phillippines Action Plan to Combat AMR One Healh Approach.docx	2	3	2,91
Mongolia National Multi sectoral Action Plan on Combatting AMR.docx	2	3	2,4
Phillippines Action Plan to Combat AMR One Healh Approach.docx	2	3	4,22
Mongolia National Multi sectoral Action Plan on Combatting AMR.docx	2	3	3,19
Phillippines Action Plan to Combat AMR One Healh Approach.docx	2	3	5,54
Mongolia National Multi sectoral Action Plan on Combatting AMR.docx	2	3	1,38
Phillippines Action Plan to Combat AMR One Healh Approach.docx	2	3	2,39
Mongolia National Multi sectoral Action Plan on Combatting AMR.docx	2	3	1,06
Phillippines Action Plan to Combat AMR One Healh Approach.docx	2	3	1,36
Mongolia National Multi sectoral Action Plan on Combatting AMR.docx	2	3	,65
Phillippines Action Plan to Combat AMR One Healh Approach.docx	2	3	2,18
Mongolia National Multi sectoral Action Plan on Combatting AMR.docx	2	3	3,23
Phillippines Action Plan to Combat AMR One Healh Approach.docx	2	3	4,42
Mongolia National Multi sectoral Action Plan on Combatting AMR.docx	2	3	2,51
Phillippines Action Plan to Combat AMR One Healh Approach.docx	2	3	2,7
Mongolia National Multi sectoral Action Plan on Combatting AMR.docx	2	3	2,4
Phillippines Action Plan to Combat AMR One Healh Approach.docx	2	3	6,54
Mongolia National Multi sectoral Action Plan on Combatting AMR.docx	2	3	3,61
Phillippines Action Plan to Combat AMR One Healh Approach.docx	2	3	4,74
Mongolia National Multi sectoral Action Plan on Combatting AMR.docx	2	3	1,86
Phillippines Action Plan to Combat AMR One Healh Approach.docx	2	3	2,96
Mongolia National Multi sectoral Action Plan on Combatting AMR.docx	2	3	1,29
Phillippines Action Plan to Combat AMR One Healh Approach.docx	2	3	2,98
Mongolia National Multi sectoral Action Plan on Combatting AMR.docx	2	3	2,29
Phillippines Action Plan to Combat AMR One Healh Approach.docx	2	3	3,41
Mongolia National Multi sectoral Action Plan on Combatting AMR.docx	2	3	3,93
Phillippines Action Plan to Combat AMR One Healh Approach.docx	2	3	11,38
Mongolia National Multi sectoral Action Plan on Combatting AMR.docx	2	3	3,58
Phillippines Action Plan to Combat AMR One Healh Approach.docx	2	3	4,96
Mongolia National Multi sectoral Action Plan on Combatting AMR.docx	2	3	3,79
Phillippines Action Plan to Combat AMR One Healh Approach.docx	2	3	4,69
Mongolia National Multi sectoral Action Plan on Combatting AMR.docx	2	3	2,76
Phillippines Action Plan to Combat AMR One Healh Approach.docx	2	3	5,16
Mongolia National Multi sectoral Action Plan on Combatting AMR.docx	2	3	2,21
Phillippines Action Plan to Combat AMR One Healh Approach.docx	2	3	3,15
Mongolia National Multi sectoral Action Plan on Combatting AMR.docx	2	3	1,69
Phillippines Action Plan to Combat AMR One Healh Approach.docx	2	3	2,32
Mongolia National Multi sectoral Action Plan on Combatting AMR.docx	2	3	1,68
Phillippines Action Plan to Combat AMR One Healh Approach.docx	2	3	3,21
Mongolia National Multi sectoral Action Plan on Combatting AMR.docx	2	3	3,03
Phillippines Action Plan to Combat AMR One Healh Approach.docx	2	3	5,62
Mongolia National Multi sectoral Action Plan on Combatting AMR.docx	2	3
Phillippines Action Plan to Combat AMR One Healh Approach.docx	2	3	4,51
Mongolia National Multi sectoral Action Plan on Combatting AMR.docx	2	3	1,81
Phillippines Action Plan to Combat AMR One Healh Approach.docx	2	3	1,93
Mongolia National Multi sectoral Action Plan on Combatting AMR.docx	2	3	2,65
Phillippines Action Plan to Combat AMR One Healh Approach.docx	2	3	4,56
Mongolia National Multi sectoral Action Plan on Combatting AMR.docx	2	3	,63
Phillippines Action Plan to Combat AMR One Healh Approach.docx	2	3	1,83
Mongolia National Multi sectoral Action Plan on Combatting AMR.docx	2	3	1,53
Phillippines Action Plan to Combat AMR One Healh Approach.docx	2	3	2,96
Mongolia National Multi sectoral Action Plan on Combatting AMR.docx	2	3	1,16
Phillippines Action Plan to Combat AMR One Healh Approach.docx	2	3	1,86
Mongolia National Multi sectoral Action Plan on Combatting AMR.docx	2	3	,97
Phillippines Action Plan to Combat AMR One Healh Approach.docx	2	3	2,16
Mongolia National Multi sectoral Action Plan on Combatting AMR.docx	2	3	3,33
Phillippines Action Plan to Combat AMR One Healh Approach.docx	2	3	5,69
Mongolia National Multi sectoral Action Plan on Combatting AMR.docx	2	3	2,31
Phillippines Action Plan to Combat AMR One Healh Approach.docx	2	3	3,91
Mongolia National Multi sectoral Action Plan on Combatting AMR.docx	2	3	3,57
Phillippines Action Plan to Combat AMR One Healh Approach.docx	2	3
Mongolia National Multi sectoral Action Plan on Combatting AMR.docx	2	3	4,23
Phillippines Action Plan to Combat AMR One Healh Approach.docx	2	3	4,74
Mongolia National Multi sectoral Action Plan on Combatting AMR.docx	2	3	3,09
Phillippines Action Plan to Combat AMR One Healh Approach.docx	2	3	4,56
Mongolia National Multi sectoral Action Plan on Combatting AMR.docx	2	3	6,31
Phillippines Action Plan to Combat AMR One Healh Approach.docx	2	3	9,06
Mongolia National Multi sectoral Action Plan on Combatting AMR.docx	2	3	1,85
Phillippines Action Plan to Combat AMR One Healh Approach.docx	2	3	3,73
Mongolia National Multi sectoral Action Plan on Combatting AMR.docx	2	3	2,31
Phillippines Action Plan to Combat AMR One Healh Approach.docx	2	3	5,28
Mongolia National Multi sectoral Action Plan on Combatting AMR.docx	2	3	1,3
Phillippines Action Plan to Combat AMR One Healh Approach.docx	2	3	2,46
Mongolia National Multi sectoral Action Plan on Combatting AMR.docx	2	3	2,95
Phillippines Action Plan to Combat AMR One Healh Approach.docx	2	3	5,8
Mongolia National Multi sectoral Action Plan on Combatting AMR.docx	2	3	4,28
Phillippines Action Plan to Combat AMR One Healh Approach.docx	2	3	5,97
Mongolia National Multi sectoral Action Plan on Combatting AMR.docx	2	3	,86
Phillippines Action Plan to Combat AMR One Healh Approach.docx	2	3	2,54
Mongolia National Multi sectoral Action Plan on Combatting AMR.docx	2	3	1,91
Phillippines Action Plan to Combat AMR One Healh Approach.docx	2	3	1,77
Mongolia National Multi sectoral Action Plan on Combatting AMR.docx	2	3	3,48
Phillippines Action Plan to Combat AMR One Healh Approach.docx	2	3	5,08
Mongolia National Multi sectoral Action Plan on Combatting AMR.docx	2	3	2,01
Phillippines Action Plan to Combat AMR One Healh Approach.docx	2	3	3,33
Mongolia National Multi sectoral Action Plan on Combatting AMR.docx	2	3	2
Phillippines Action Plan to Combat AMR One Healh Approach.docx	2	3	3,75
Mongolia National Multi sectoral Action Plan on Combatting AMR.docx	2	3	1,92
Phillippines Action Plan to Combat AMR One Healh Approach.docx	2	3	2,47
Mongolia National Multi sectoral Action Plan on Combatting AMR.docx	2	3	3,62
Phillippines Action Plan to Combat AMR One Healh Approach.docx	2	3	5,55
Mongolia National Multi sectoral Action Plan on Combatting AMR.docx	2	3	1,78
Phillippines Action Plan to Combat AMR One Healh Approach.docx	2	3	2,11
Mongolia National Multi sectoral Action Plan on Combatting AMR.docx	2	3	,84
Phillippines Action Plan to Combat AMR One Healh Approach.docx	2	3	1,79
Mongolia National Multi sectoral Action Plan on Combatting AMR.docx	2	3	1,65
Phillippines Action Plan to Combat AMR One Healh Approach.docx	2	3	2,25
Mongolia National Multi sectoral Action Plan on Combatting AMR.docx	2	3	1,46
Phillippines Action Plan to Combat AMR One Healh Approach.docx	2	3	2,99
Mongolia National Multi sectoral Action Plan on Combatting AMR.docx	2	3	1,77
Phillippines Action Plan to Combat AMR One Healh Approach.docx	2	3	2,69
Pakistan AMR National Action Plan.docx	2	5	8,28
Sudan National action plan on AMR.docx	2	5	9,65
Pakistan AMR National Action Plan.docx	2	5	3,37
Sudan National action plan on AMR.docx	2	5	3,21
Pakistan AMR National Action Plan.docx	2	5	11,85
Sudan National action plan on AMR.docx	2	5	11,49
Pakistan AMR National Action Plan.docx	2	5	6,96
Sudan National action plan on AMR.docx	2	5	6,33
Pakistan AMR National Action Plan.docx	2	5	11,97
Sudan National action plan on AMR.docx	2	5	13,52
Pakistan AMR National Action Plan.docx	2	5	4,07
Sudan National action plan on AMR.docx	2	5	4,17
Pakistan AMR National Action Plan.docx	2	5	4,55
Sudan National action plan on AMR.docx	2	5	4,15
Pakistan AMR National Action Plan.docx	2	5	2,74
Sudan National action plan on AMR.docx	2	5	1,85
Pakistan AMR National Action Plan.docx	2	5	4,15
Sudan National action plan on AMR.docx	2	5	3,86
Pakistan AMR National Action Plan.docx	2	5	4,4
Sudan National action plan on AMR.docx	2	5	5,26
Pakistan AMR National Action Plan.docx	2	5	7,69
Sudan National action plan on AMR.docx	2	5	9,42
Pakistan AMR National Action Plan.docx	2	5	4,56
Sudan National action plan on AMR.docx	2	5	4,41
Pakistan AMR National Action Plan.docx	2	5	1,9
Sudan National action plan on AMR.docx	2	5	1,21
Pakistan AMR National Action Plan.docx	2	5	2,6
Sudan National action plan on AMR.docx	2	5	3,18
Pakistan AMR National Action Plan.docx	2	5	7,11
Sudan National action plan on AMR.docx	2	5	8,61
Pakistan AMR National Action Plan.docx	2	5	7,19
Sudan National action plan on AMR.docx	2	5	6,31
Pakistan AMR National Action Plan.docx	2	5	4,59
Sudan National action plan on AMR.docx	2	5	6,22
Pakistan AMR National Action Plan.docx	2	5	8,26
Sudan National action plan on AMR.docx	2	5	8,29
Pakistan AMR National Action Plan.docx	2	5	3,22
Sudan National action plan on AMR.docx	2	5	3,99
Pakistan AMR National Action Plan.docx	2	5	3,34
Sudan National action plan on AMR.docx	2	5	2,33
Pakistan AMR National Action Plan.docx	2	5	7,51
Sudan National action plan on AMR.docx	2	5	7,4
Pakistan AMR National Action Plan.docx	2	5	7,95
Sudan National action plan on AMR.docx	2	5	8,73
Pakistan AMR National Action Plan.docx	2	5	8,23
Sudan National action plan on AMR.docx	2	5	5,98
Pakistan AMR National Action Plan.docx	2	5	5,45
Sudan National action plan on AMR.docx	2	5	4,96
Pakistan AMR National Action Plan.docx	2	5	7,21
Sudan National action plan on AMR.docx	2	5	6,77
Pakistan AMR National Action Plan.docx	2	5	5,56
Sudan National action plan on AMR.docx	2	5	5,79
Pakistan AMR National Action Plan.docx	2	5	4,94
Sudan National action plan on AMR.docx	2	5	3,77
Pakistan AMR National Action Plan.docx	2	5	3,3
Sudan National action plan on AMR.docx	2	5	3,41
Pakistan AMR National Action Plan.docx	2	5	6,65
Sudan National action plan on AMR.docx	2	5	7,79
Pakistan AMR National Action Plan.docx	2	5	5,9
Sudan National action plan on AMR.docx	2	5	6,04
Pakistan AMR National Action Plan.docx	2	5	5,14
Sudan National action plan on AMR.docx	2	5	4,06
Pakistan AMR National Action Plan.docx	2	5	7,18
Sudan National action plan on AMR.docx	2	5	6,44
Pakistan AMR National Action Plan.docx	2	5	2,14
Sudan National action plan on AMR.docx	2	5	1,86
Pakistan AMR National Action Plan.docx	2	5	7,35
Sudan National action plan on AMR.docx	2	5	4,57
Pakistan AMR National Action Plan.docx	2	5	2,95
Sudan National action plan on AMR.docx	2	5	3,36
Pakistan AMR National Action Plan.docx	2	5	2,15
Sudan National action plan on AMR.docx	2	5	2,33
Pakistan AMR National Action Plan.docx	2	5	7,87
Sudan National action plan on AMR.docx	2	5	6,16
Pakistan AMR National Action Plan.docx	2	5
Sudan National action plan on AMR.docx	2	5	6,27
Pakistan AMR National Action Plan.docx	2	5	6,34
Sudan National action plan on AMR.docx	2	5	6,73
Pakistan AMR National Action Plan.docx	2	5	10,31
Sudan National action plan on AMR.docx	2	5	9,18
Pakistan AMR National Action Plan.docx	2	5	4,09
Sudan National action plan on AMR.docx	2	5	4,39
Pakistan AMR National Action Plan.docx	2	5	12,46
Sudan National action plan on AMR.docx	2	5	10,33
Pakistan AMR National Action Plan.docx	2	5	3,33
Sudan National action plan on AMR.docx	2	5	3,54
Pakistan AMR National Action Plan.docx	2	5	4,03
Sudan National action plan on AMR.docx	2	5	4,05
Pakistan AMR National Action Plan.docx	2	5	2,54
Sudan National action plan on AMR.docx	2	5	2,66
Pakistan AMR National Action Plan.docx	2	5	8,87
Sudan National action plan on AMR.docx	2	5	8,9
Pakistan AMR National Action Plan.docx	2	5	11,29
Sudan National action plan on AMR.docx	2	5
Pakistan AMR National Action Plan.docx	2	5	3,03
Sudan National action plan on AMR.docx	2	5	2,43
Pakistan AMR National Action Plan.docx	2	5	1,74
Sudan National action plan on AMR.docx	2	5	1,63
Pakistan AMR National Action Plan.docx	2	5	6,53
Sudan National action plan on AMR.docx	2	5	7,46
Pakistan AMR National Action Plan.docx	2	5	6,88
Sudan National action plan on AMR.docx	2	5	6,67
Pakistan AMR National Action Plan.docx	2	5	5,6
Sudan National action plan on AMR.docx	2	5	5,88
Pakistan AMR National Action Plan.docx	2	5	6,11
Sudan National action plan on AMR.docx	2	5	4,86
Pakistan AMR National Action Plan.docx	2	5	5,48
Sudan National action plan on AMR.docx	2	5	6,05
Pakistan AMR National Action Plan.docx	2	5	2,75
Sudan National action plan on AMR.docx	2	5	2,86
Pakistan AMR National Action Plan.docx	2	5	2,03
Sudan National action plan on AMR.docx	2	5	2,07
Pakistan AMR National Action Plan.docx	2	5	2,74
Sudan National action plan on AMR.docx	2	5	2,27
Pakistan AMR National Action Plan.docx	2	5	5,82
Sudan National action plan on AMR.docx	2	5	5,52
Pakistan AMR National Action Plan.docx	2	5	3,95
Sudan National action plan on AMR.docx	2	5	4,64
Tajikistan National Plan to Tackle AMR.docx	2	6	7,03
Tajikistan National Plan to Tackle AMR.docx	2	6	2,59
Tajikistan National Plan to Tackle AMR.docx	2	6	19,12
Tajikistan National Plan to Tackle AMR.docx	2	6	4,49
Tajikistan National Plan to Tackle AMR.docx	2	6	10,4
Tajikistan National Plan to Tackle AMR.docx	2	6	2,28
Tajikistan National Plan to Tackle AMR.docx	2	6	2,6
Tajikistan National Plan to Tackle AMR.docx	2	6	1,95
Tajikistan National Plan to Tackle AMR.docx	2	6	3,53
Tajikistan National Plan to Tackle AMR.docx	2	6	3,28
Tajikistan National Plan to Tackle AMR.docx	2	6	6,73
Tajikistan National Plan to Tackle AMR.docx	2	6	3,92
Tajikistan National Plan to Tackle AMR.docx	2	6	1,45
Tajikistan National Plan to Tackle AMR.docx	2	6	2,3
Tajikistan National Plan to Tackle AMR.docx	2	6	6,56
Tajikistan National Plan to Tackle AMR.docx	2	6	5,78
Tajikistan National Plan to Tackle AMR.docx	2	6	5,37
Tajikistan National Plan to Tackle AMR.docx	2	6	8,34
Tajikistan National Plan to Tackle AMR.docx	2	6	3,19
Tajikistan National Plan to Tackle AMR.docx	2	6	1,94
Tajikistan National Plan to Tackle AMR.docx	2	6	6,11
Tajikistan National Plan to Tackle AMR.docx	2	6	5,5
Tajikistan National Plan to Tackle AMR.docx	2	6	6,01
Tajikistan National Plan to Tackle AMR.docx	2	6	4,41
Tajikistan National Plan to Tackle AMR.docx	2	6	10,97
Tajikistan National Plan to Tackle AMR.docx	2	6	5,32
Tajikistan National Plan to Tackle AMR.docx	2	6	3,51
Tajikistan National Plan to Tackle AMR.docx	2	6	2,99
Tajikistan National Plan to Tackle AMR.docx	2	6	6,2
Tajikistan National Plan to Tackle AMR.docx	2	6	4,12
Tajikistan National Plan to Tackle AMR.docx	2	6	3,79
Tajikistan National Plan to Tackle AMR.docx	2	6	5,29
Tajikistan National Plan to Tackle AMR.docx	2	6	2,38
Tajikistan National Plan to Tackle AMR.docx	2	6	6
Tajikistan National Plan to Tackle AMR.docx	2	6	2,37
Tajikistan National Plan to Tackle AMR.docx	2	6	2,71
Tajikistan National Plan to Tackle AMR.docx	2	6	5,81
Tajikistan National Plan to Tackle AMR.docx	2	6	3,74
Tajikistan National Plan to Tackle AMR.docx	2	6	4,12
Tajikistan National Plan to Tackle AMR.docx	2	6	11,28
Tajikistan National Plan to Tackle AMR.docx	2	6	6
Tajikistan National Plan to Tackle AMR.docx	2	6	11,92
Tajikistan National Plan to Tackle AMR.docx	2	6	2,76
Tajikistan National Plan to Tackle AMR.docx	2	6	3,6
Tajikistan National Plan to Tackle AMR.docx	2	6	2,49
Tajikistan National Plan to Tackle AMR.docx	2	6	7,28
Tajikistan National Plan to Tackle AMR.docx	2	6	7,91
Tajikistan National Plan to Tackle AMR.docx	2	6	3,06
Tajikistan National Plan to Tackle AMR.docx	2	6	1,75
Tajikistan National Plan to Tackle AMR.docx	2	6
Tajikistan National Plan to Tackle AMR.docx	2	6	5,54
Tajikistan National Plan to Tackle AMR.docx	2	6	3,67
Tajikistan National Plan to Tackle AMR.docx	2	6	4,47
Tajikistan National Plan to Tackle AMR.docx	2	6	4,65
Tajikistan National Plan to Tackle AMR.docx	2	6	2,03
Tajikistan National Plan to Tackle AMR.docx	2	6	1,67
Tajikistan National Plan to Tackle AMR.docx	2	6	1,73
Tajikistan National Plan to Tackle AMR.docx	2	6	4,14
Tajikistan National Plan to Tackle AMR.docx	2	6	2,59
Mauritius National Action Plan on AMR.docx	3	1	7,05
South Africa Antimicrobial Resistance national action plan 2018 2024.docx	3	1	4,28
Mauritius National Action Plan on AMR.docx	3	1	3,51
South Africa Antimicrobial Resistance national action plan 2018 2024.docx	3	1	4,56
Mauritius National Action Plan on AMR.docx	3	1	7,91
South Africa Antimicrobial Resistance national action plan 2018 2024.docx	3	1	6,78
Mauritius National Action Plan on AMR.docx	3	1	4,78
South Africa Antimicrobial Resistance national action plan 2018 2024.docx	3	1	3,57
Mauritius National Action Plan on AMR.docx	3	1	7,81
South Africa Antimicrobial Resistance national action plan 2018 2024.docx	3	1	6,55
Mauritius National Action Plan on AMR.docx	3	1	3,24
South Africa Antimicrobial Resistance national action plan 2018 2024.docx	3	1	3,54
Mauritius National Action Plan on AMR.docx	3	1	4,65
South Africa Antimicrobial Resistance national action plan 2018 2024.docx	3	1	5,65
Mauritius National Action Plan on AMR.docx	3	1	2,52
South Africa Antimicrobial Resistance national action plan 2018 2024.docx	3	1	2,49
Mauritius National Action Plan on AMR.docx	3	1	3,53
South Africa Antimicrobial Resistance national action plan 2018 2024.docx	3	1	3,41
Mauritius National Action Plan on AMR.docx	3	1	5,93
South Africa Antimicrobial Resistance national action plan 2018 2024.docx	3	1	4,53
Mauritius National Action Plan on AMR.docx	3	1	9,23
South Africa Antimicrobial Resistance national action plan 2018 2024.docx	3	1	5,1
Mauritius National Action Plan on AMR.docx	3	1	5,06
South Africa Antimicrobial Resistance national action plan 2018 2024.docx	3	1	2,77
Mauritius National Action Plan on AMR.docx	3	1	1,18
South Africa Antimicrobial Resistance national action plan 2018 2024.docx	3	1	1,7
Mauritius National Action Plan on AMR.docx	3	1	2,22
South Africa Antimicrobial Resistance national action plan 2018 2024.docx	3	1	2,48
Mauritius National Action Plan on AMR.docx	3	1	5,73
South Africa Antimicrobial Resistance national action plan 2018 2024.docx	3	1	3,91
Mauritius National Action Plan on AMR.docx	3	1	4,82
South Africa Antimicrobial Resistance national action plan 2018 2024.docx	3	1	4,19
Mauritius National Action Plan on AMR.docx	3	1	6,05
South Africa Antimicrobial Resistance national action plan 2018 2024.docx	3	1	4,92
Mauritius National Action Plan on AMR.docx	3	1	5,49
South Africa Antimicrobial Resistance national action plan 2018 2024.docx	3	1	5,18
Mauritius National Action Plan on AMR.docx	3	1	3,1
South Africa Antimicrobial Resistance national action plan 2018 2024.docx	3	1	3,38
Mauritius National Action Plan on AMR.docx	3	1	3,06
South Africa Antimicrobial Resistance national action plan 2018 2024.docx	3	1	3,05
Mauritius National Action Plan on AMR.docx	3	1	4,1
South Africa Antimicrobial Resistance national action plan 2018 2024.docx	3	1	2,9
Mauritius National Action Plan on AMR.docx	3	1	6,86
South Africa Antimicrobial Resistance national action plan 2018 2024.docx	3	1	4,98
Mauritius National Action Plan on AMR.docx	3	1	4,76
South Africa Antimicrobial Resistance national action plan 2018 2024.docx	3	1	3,25
Mauritius National Action Plan on AMR.docx	3	1	3,69
South Africa Antimicrobial Resistance national action plan 2018 2024.docx	3	1	3,59
Mauritius National Action Plan on AMR.docx	3	1	4,49
South Africa Antimicrobial Resistance national action plan 2018 2024.docx	3	1	4,34
Mauritius National Action Plan on AMR.docx	3	1	4,75
South Africa Antimicrobial Resistance national action plan 2018 2024.docx	3	1	3,81
Mauritius National Action Plan on AMR.docx	3	1	3,41
South Africa Antimicrobial Resistance national action plan 2018 2024.docx	3	1	3,46
Mauritius National Action Plan on AMR.docx	3	1	3,61
South Africa Antimicrobial Resistance national action plan 2018 2024.docx	3	1	3,52
Mauritius National Action Plan on AMR.docx	3	1
South Africa Antimicrobial Resistance national action plan 2018 2024.docx	3	1	5,85
Mauritius National Action Plan on AMR.docx	3	1	4,82
South Africa Antimicrobial Resistance national action plan 2018 2024.docx	3	1	4,32
Mauritius National Action Plan on AMR.docx	3	1	3,57
South Africa Antimicrobial Resistance national action plan 2018 2024.docx	3	1	3,31
Mauritius National Action Plan on AMR.docx	3	1	4,64
South Africa Antimicrobial Resistance national action plan 2018 2024.docx	3	1	4,77
Mauritius National Action Plan on AMR.docx	3	1	1,88
South Africa Antimicrobial Resistance national action plan 2018 2024.docx	3	1	2,48
Mauritius National Action Plan on AMR.docx	3	1	4,5
South Africa Antimicrobial Resistance national action plan 2018 2024.docx	3	1	5,04
Mauritius National Action Plan on AMR.docx	3	1	2,9
South Africa Antimicrobial Resistance national action plan 2018 2024.docx	3	1	2,17
Mauritius National Action Plan on AMR.docx	3	1	2,01
South Africa Antimicrobial Resistance national action plan 2018 2024.docx	3	1	3,33
Mauritius National Action Plan on AMR.docx	3	1	5,83
South Africa Antimicrobial Resistance national action plan 2018 2024.docx	3	1	5,87
Mauritius National Action Plan on AMR.docx	3	1	3,78
South Africa Antimicrobial Resistance national action plan 2018 2024.docx	3	1	3,69
Mauritius National Action Plan on AMR.docx	3	1	4,91
South Africa Antimicrobial Resistance national action plan 2018 2024.docx	3	1	6,34
Mauritius National Action Plan on AMR.docx	3	1	7,05
South Africa Antimicrobial Resistance national action plan 2018 2024.docx	3	1	5,03
Mauritius National Action Plan on AMR.docx	3	1	4,72
South Africa Antimicrobial Resistance national action plan 2018 2024.docx	3	1	3,59
Mauritius National Action Plan on AMR.docx	3	1	9,55
South Africa Antimicrobial Resistance national action plan 2018 2024.docx	3	1	8,86
Mauritius National Action Plan on AMR.docx	3	1	3,32
South Africa Antimicrobial Resistance national action plan 2018 2024.docx	3	1	4,93
Mauritius National Action Plan on AMR.docx	3	1	4,78
South Africa Antimicrobial Resistance national action plan 2018 2024.docx	3	1
Mauritius National Action Plan on AMR.docx	3	1	3,24
South Africa Antimicrobial Resistance national action plan 2018 2024.docx	3	1	1,91
Mauritius National Action Plan on AMR.docx	3	1	6,76
South Africa Antimicrobial Resistance national action plan 2018 2024.docx	3	1	5,4
Mauritius National Action Plan on AMR.docx	3	1	7,54
South Africa Antimicrobial Resistance national action plan 2018 2024.docx	3	1	5,24
Mauritius National Action Plan on AMR.docx	3	1	2,56
South Africa Antimicrobial Resistance national action plan 2018 2024.docx	3	1	2,36
Mauritius National Action Plan on AMR.docx	3	1	1,53
South Africa Antimicrobial Resistance national action plan 2018 2024.docx	3	1	2,58
Mauritius National Action Plan on AMR.docx	3	1	6,77
South Africa Antimicrobial Resistance national action plan 2018 2024.docx	3	1	5,28
Mauritius National Action Plan on AMR.docx	3	1	3,85
South Africa Antimicrobial Resistance national action plan 2018 2024.docx	3	1	3,62
Mauritius National Action Plan on AMR.docx	3	1	5,6
South Africa Antimicrobial Resistance national action plan 2018 2024.docx	3	1	3,57
Mauritius National Action Plan on AMR.docx	3	1	4,13
South Africa Antimicrobial Resistance national action plan 2018 2024.docx	3	1	3,62
Mauritius National Action Plan on AMR.docx	3	1	4,86
South Africa Antimicrobial Resistance national action plan 2018 2024.docx	3	1	6,1
Mauritius National Action Plan on AMR.docx	3	1	2,51
South Africa Antimicrobial Resistance national action plan 2018 2024.docx	3	1	2,57
Mauritius National Action Plan on AMR.docx	3	1	1,45
South Africa Antimicrobial Resistance national action plan 2018 2024.docx	3	1	2,47
Mauritius National Action Plan on AMR.docx	3	1	2,44
South Africa Antimicrobial Resistance national action plan 2018 2024.docx	3	1	2,57
Mauritius National Action Plan on AMR.docx	3	1	3,88
South Africa Antimicrobial Resistance national action plan 2018 2024.docx	3	1	2,18
Mauritius National Action Plan on AMR.docx	3	1	4,14
South Africa Antimicrobial Resistance national action plan 2018 2024.docx	3	1	4,81
Maldives National Action Plan for Containment of AMR.docx	3	2	10,81
Thailand National Strategic Plan on AMR.docx	3	2	5,61
Maldives National Action Plan for Containment of AMR.docx	3	2	4,47
Thailand National Strategic Plan on AMR.docx	3	2	4,8
Maldives National Action Plan for Containment of AMR.docx	3	2	13,22
Thailand National Strategic Plan on AMR.docx	3	2	4,8
Maldives National Action Plan for Containment of AMR.docx	3	2	7,34
Thailand National Strategic Plan on AMR.docx	3	2	2,85
Maldives National Action Plan for Containment of AMR.docx	3	2	10,97
Thailand National Strategic Plan on AMR.docx	3	2	5,63
Maldives National Action Plan for Containment of AMR.docx	3	2	4,71
Thailand National Strategic Plan on AMR.docx	3	2	3,42
Maldives National Action Plan for Containment of AMR.docx	3	2	6,58
Thailand National Strategic Plan on AMR.docx	3	2	5,04
Maldives National Action Plan for Containment of AMR.docx	3	2	4,09
Thailand National Strategic Plan on AMR.docx	3	2	2,52
Maldives National Action Plan for Containment of AMR.docx	3	2	4,32
Thailand National Strategic Plan on AMR.docx	3	2	5,23
Maldives National Action Plan for Containment of AMR.docx	3	2	6,87
Thailand National Strategic Plan on AMR.docx	3	2	4,25
Maldives National Action Plan for Containment of AMR.docx	3	2	10,26
Thailand National Strategic Plan on AMR.docx	3	2	8,35
Maldives National Action Plan for Containment of AMR.docx	3	2	5,15
Thailand National Strategic Plan on AMR.docx	3	2	5,8
Maldives National Action Plan for Containment of AMR.docx	3	2	2,49
Thailand National Strategic Plan on AMR.docx	3	2	1,46
Maldives National Action Plan for Containment of AMR.docx	3	2	3,05
Thailand National Strategic Plan on AMR.docx	3	2	2,54
Maldives National Action Plan for Containment of AMR.docx	3	2	8,99
Thailand National Strategic Plan on AMR.docx	3	2	5,45
Maldives National Action Plan for Containment of AMR.docx	3	2	51,93
Thailand National Strategic Plan on AMR.docx	3	2	4,33
Maldives National Action Plan for Containment of AMR.docx	3	2	6,28
Thailand National Strategic Plan on AMR.docx	3	2	6,7
Maldives National Action Plan for Containment of AMR.docx	3	2	7,73
Thailand National Strategic Plan on AMR.docx	3	2	4,47
Maldives National Action Plan for Containment of AMR.docx	3	2	4,88
Thailand National Strategic Plan on AMR.docx	3	2	3,99
Maldives National Action Plan for Containment of AMR.docx	3	2	3,67
Thailand National Strategic Plan on AMR.docx	3	2	4,05
Maldives National Action Plan for Containment of AMR.docx	3	2	11,26
Thailand National Strategic Plan on AMR.docx	3	2	4,88
Maldives National Action Plan for Containment of AMR.docx	3	2	10,44
Thailand National Strategic Plan on AMR.docx	3	2	6,98
Maldives National Action Plan for Containment of AMR.docx	3	2	6,47
Thailand National Strategic Plan on AMR.docx	3	2	2,68
Maldives National Action Plan for Containment of AMR.docx	3	2	1,76
Thailand National Strategic Plan on AMR.docx	3	2	,72
Maldives National Action Plan for Containment of AMR.docx	3	2	6,78
Thailand National Strategic Plan on AMR.docx	3	2	1,39
Maldives National Action Plan for Containment of AMR.docx	3	2	6,53
Thailand National Strategic Plan on AMR.docx	3	2	4,52
Maldives National Action Plan for Containment of AMR.docx	3	2
Thailand National Strategic Plan on AMR.docx	3	2	3,21
Maldives National Action Plan for Containment of AMR.docx	3	2	5,01
Thailand National Strategic Plan on AMR.docx	3	2	4,3
Maldives National Action Plan for Containment of AMR.docx	3	2	7,97
Thailand National Strategic Plan on AMR.docx	3	2	6,32
Maldives National Action Plan for Containment of AMR.docx	3	2	7,82
Thailand National Strategic Plan on AMR.docx	3	2	5,61
Maldives National Action Plan for Containment of AMR.docx	3	2	63,34
Thailand National Strategic Plan on AMR.docx	3	2	2,94
Maldives National Action Plan for Containment of AMR.docx	3	2	6,5
Thailand National Strategic Plan on AMR.docx	3	2	5,36
Maldives National Action Plan for Containment of AMR.docx	3	2	2,96
Thailand National Strategic Plan on AMR.docx	3	2	2,84
Maldives National Action Plan for Containment of AMR.docx	3	2	8,57
Thailand National Strategic Plan on AMR.docx	3	2	7,12
Maldives National Action Plan for Containment of AMR.docx	3	2	3,6
Thailand National Strategic Plan on AMR.docx	3	2	2,43
Maldives National Action Plan for Containment of AMR.docx	3	2	3,44
Thailand National Strategic Plan on AMR.docx	3	2	2,86
Maldives National Action Plan for Containment of AMR.docx	3	2	7,51
Thailand National Strategic Plan on AMR.docx	3	2	5,68
Maldives National Action Plan for Containment of AMR.docx	3	2	6,56
Thailand National Strategic Plan on AMR.docx	3	2	2,94
Maldives National Action Plan for Containment of AMR.docx	3	2	3,88
Thailand National Strategic Plan on AMR.docx	3	2	3,42
Maldives National Action Plan for Containment of AMR.docx	3	2	11,72
Thailand National Strategic Plan on AMR.docx	3	2	3,55
Maldives National Action Plan for Containment of AMR.docx	3	2	5,2
Thailand National Strategic Plan on AMR.docx	3	2	3,4
Maldives National Action Plan for Containment of AMR.docx	3	2	7,02
Thailand National Strategic Plan on AMR.docx	3	2	4
Maldives National Action Plan for Containment of AMR.docx	3	2	6,39
Thailand National Strategic Plan on AMR.docx	3	2	5,09
Maldives National Action Plan for Containment of AMR.docx	3	2	5,93
Thailand National Strategic Plan on AMR.docx	3	2	4,86
Maldives National Action Plan for Containment of AMR.docx	3	2	3,14
Thailand National Strategic Plan on AMR.docx	3	2	6,08
Maldives National Action Plan for Containment of AMR.docx	3	2	10,23
Thailand National Strategic Plan on AMR.docx	3	2	7,34
Maldives National Action Plan for Containment of AMR.docx	3	2	10,79
Thailand National Strategic Plan on AMR.docx	3	2	6,27
Maldives National Action Plan for Containment of AMR.docx	3	2	4,36
Thailand National Strategic Plan on AMR.docx	3	2	2,83
Maldives National Action Plan for Containment of AMR.docx	3	2	3,39
Thailand National Strategic Plan on AMR.docx	3	2	1,83
Maldives National Action Plan for Containment of AMR.docx	3	2	6,33
Thailand National Strategic Plan on AMR.docx	3	2	3,48
Maldives National Action Plan for Containment of AMR.docx	3	2	7,85
Thailand National Strategic Plan on AMR.docx	3	2	3,81
Maldives National Action Plan for Containment of AMR.docx	3	2	6,4
Thailand National Strategic Plan on AMR.docx	3	2
Maldives National Action Plan for Containment of AMR.docx	3	2	65,28
Thailand National Strategic Plan on AMR.docx	3	2	3,6
Maldives National Action Plan for Containment of AMR.docx	3	2	6,61
Thailand National Strategic Plan on AMR.docx	3	2	5,16
Maldives National Action Plan for Containment of AMR.docx	3	2	3,55
Thailand National Strategic Plan on AMR.docx	3	2	2,68
Maldives National Action Plan for Containment of AMR.docx	3	2	2,93
Thailand National Strategic Plan on AMR.docx	3	2	2,48
Maldives National Action Plan for Containment of AMR.docx	3	2	2,68
Thailand National Strategic Plan on AMR.docx	3	2	2,69
Maldives National Action Plan for Containment of AMR.docx	3	2	6,8
Thailand National Strategic Plan on AMR.docx	3	2	2,71
Maldives National Action Plan for Containment of AMR.docx	3	2	6,08
Thailand National Strategic Plan on AMR.docx	3	2	3,78
China in Chinese and English.docx	3	3	1,03
Fiji National AMR Action Plan.docx	3	3	3,86
Malaysia Action Plan on AMR.docx	3	3	7,4
China in Chinese and English.docx	3	3	,98
Fiji National AMR Action Plan.docx	3	3	3,38
Malaysia Action Plan on AMR.docx	3	3	3,48
China in Chinese and English.docx	3	3	,41
Fiji National AMR Action Plan.docx	3	3	4,02
Malaysia Action Plan on AMR.docx	3	3	8,23
China in Chinese and English.docx	3	3	1,01
Fiji National AMR Action Plan.docx	3	3	3
Malaysia Action Plan on AMR.docx	3	3	5,46
China in Chinese and English.docx	3	3	1,38
Fiji National AMR Action Plan.docx	3	3	3,87
Malaysia Action Plan on AMR.docx	3	3	9,54
China in Chinese and English.docx	3	3	1,92
Fiji National AMR Action Plan.docx	3	3	1,48
Malaysia Action Plan on AMR.docx	3	3	3,17
China in Chinese and English.docx	3	3	,49
Fiji National AMR Action Plan.docx	3	3	2,75
Malaysia Action Plan on AMR.docx	3	3	4,27
China in Chinese and English.docx	3	3
Fiji National AMR Action Plan.docx	3	3	,85
Malaysia Action Plan on AMR.docx	3	3	1,81
China in Chinese and English.docx	3	3	,33
Fiji National AMR Action Plan.docx	3	3	2,62
Malaysia Action Plan on AMR.docx	3	3	4,61
China in Chinese and English.docx	3	3	1,01
Fiji National AMR Action Plan.docx	3	3	2,16
Malaysia Action Plan on AMR.docx	3	3	3,83
China in Chinese and English.docx	3	3	1,56
Fiji National AMR Action Plan.docx	3	3
Malaysia Action Plan on AMR.docx	3	3	8,13
China in Chinese and English.docx	3	3	1,09
Fiji National AMR Action Plan.docx	3	3	3,46
Malaysia Action Plan on AMR.docx	3	3	4,82
China in Chinese and English.docx	3	3	,31
Fiji National AMR Action Plan.docx	3	3	,83
Malaysia Action Plan on AMR.docx	3	3	1,79
China in Chinese and English.docx	3	3	,79
Fiji National AMR Action Plan.docx	3	3	1,16
Malaysia Action Plan on AMR.docx	3	3	1,73
China in Chinese and English.docx	3	3	1,01
Fiji National AMR Action Plan.docx	3	3	4,58
Malaysia Action Plan on AMR.docx	3	3	6,3
China in Chinese and English.docx	3	3	,75
Fiji National AMR Action Plan.docx	3	3	3,27
Malaysia Action Plan on AMR.docx	3	3	4,86
China in Chinese and English.docx	3	3	1,9
Fiji National AMR Action Plan.docx	3	3	5,45
Malaysia Action Plan on AMR.docx	3	3	4,81
China in Chinese and English.docx	3	3	,75
Fiji National AMR Action Plan.docx	3	3	3,13
Malaysia Action Plan on AMR.docx	3	3	6,74
China in Chinese and English.docx	3	3	,42
Fiji National AMR Action Plan.docx	3	3	2,2
Malaysia Action Plan on AMR.docx	3	3	3,33
China in Chinese and English.docx	3	3	,83
Fiji National AMR Action Plan.docx	3	3	2,21
Malaysia Action Plan on AMR.docx	3	3	4,84
China in Chinese and English.docx	3	3	,65
Fiji National AMR Action Plan.docx	3	3	2,46
Malaysia Action Plan on AMR.docx	3	3	5,04
China in Chinese and English.docx	3	3	2,11
Fiji National AMR Action Plan.docx	3	3	4,04
Malaysia Action Plan on AMR.docx	3	3	9,16
China in Chinese and English.docx	3	3	1,04
Fiji National AMR Action Plan.docx	3	3	2,3
Malaysia Action Plan on AMR.docx	3	3	4,41
China in Chinese and English.docx	3	3	,12
Fiji National AMR Action Plan.docx	3	3	,41
Malaysia Action Plan on AMR.docx	3	3	3,7
China in Chinese and English.docx	3	3	,44
Fiji National AMR Action Plan.docx	3	3	1,75
Malaysia Action Plan on AMR.docx	3	3	4,69
China in Chinese and English.docx	3	3	,45
Fiji National AMR Action Plan.docx	3	3	3,56
Malaysia Action Plan on AMR.docx	3	3
China in Chinese and English.docx	3	3	,57
Fiji National AMR Action Plan.docx	3	3	2,38
Malaysia Action Plan on AMR.docx	3	3	3,25
China in Chinese and English.docx	3	3	,47
Fiji National AMR Action Plan.docx	3	3	2,36
Malaysia Action Plan on AMR.docx	3	3	3,98
China in Chinese and English.docx	3	3	,96
Fiji National AMR Action Plan.docx	3	3	5,79
Malaysia Action Plan on AMR.docx	3	3	6,45
China in Chinese and English.docx	3	3	2,61
Fiji National AMR Action Plan.docx	3	3	3,09
Malaysia Action Plan on AMR.docx	3	3	5,44
China in Chinese and English.docx	3	3	,53
Fiji National AMR Action Plan.docx	3	3	2,42
Malaysia Action Plan on AMR.docx	3	3	2,99
China in Chinese and English.docx	3	3	1,16
Fiji National AMR Action Plan.docx	3	3	3,93
Malaysia Action Plan on AMR.docx	3	3	6,65
China in Chinese and English.docx	3	3	,51
Fiji National AMR Action Plan.docx	3	3	1,23
Malaysia Action Plan on AMR.docx	3	3	1,9
China in Chinese and English.docx	3	3	1,35
Fiji National AMR Action Plan.docx	3	3	5,54
Malaysia Action Plan on AMR.docx	3	3	7,06
China in Chinese and English.docx	3	3	,38
Fiji National AMR Action Plan.docx	3	3	1,62
Malaysia Action Plan on AMR.docx	3	3	2,55
China in Chinese and English.docx	3	3	,32
Fiji National AMR Action Plan.docx	3	3	1,62
Malaysia Action Plan on AMR.docx	3	3	2,14
China in Chinese and English.docx	3	3	1,15
Fiji National AMR Action Plan.docx	3	3	4,3
Malaysia Action Plan on AMR.docx	3	3	6,41
China in Chinese and English.docx	3	3	,59
Fiji National AMR Action Plan.docx	3	3	2,01
Malaysia Action Plan on AMR.docx	3	3	4,21
China in Chinese and English.docx	3	3	,44
Fiji National AMR Action Plan.docx	3	3	1,93
Malaysia Action Plan on AMR.docx	3	3	4,06
China in Chinese and English.docx	3	3	,6
Fiji National AMR Action Plan.docx	3	3	2,84
Malaysia Action Plan on AMR.docx	3	3	7,23
China in Chinese and English.docx	3	3	1,05
Fiji National AMR Action Plan.docx	3	3	2,75
Malaysia Action Plan on AMR.docx	3	3	3,4
China in Chinese and English.docx	3	3	,26
Fiji National AMR Action Plan.docx	3	3	4,93
Malaysia Action Plan on AMR.docx	3	3	9,12
China in Chinese and English.docx	3	3	,71
Fiji National AMR Action Plan.docx	3	3	2,35
Malaysia Action Plan on AMR.docx	3	3	4,75
China in Chinese and English.docx	3	3	,63
Fiji National AMR Action Plan.docx	3	3	2,17
Malaysia Action Plan on AMR.docx	3	3	4,31
China in Chinese and English.docx	3	3	,53
Fiji National AMR Action Plan.docx	3	3	2,2
Malaysia Action Plan on AMR.docx	3	3	2,63
China in Chinese and English.docx	3	3	1,23
Fiji National AMR Action Plan.docx	3	3	4,69
Malaysia Action Plan on AMR.docx	3	3	8,72
China in Chinese and English.docx	3	3	,98
Fiji National AMR Action Plan.docx	3	3	4,6
Malaysia Action Plan on AMR.docx	3	3	8,59
China in Chinese and English.docx	3	3	,38
Fiji National AMR Action Plan.docx	3	3	1,88
Malaysia Action Plan on AMR.docx	3	3	2,02
China in Chinese and English.docx	3	3	,37
Fiji National AMR Action Plan.docx	3	3	,85
Malaysia Action Plan on AMR.docx	3	3	1,31
China in Chinese and English.docx	3	3	,63
Fiji National AMR Action Plan.docx	3	3	2,94
Malaysia Action Plan on AMR.docx	3	3	6,68
China in Chinese and English.docx	3	3	,44
Fiji National AMR Action Plan.docx	3	3	3,05
Malaysia Action Plan on AMR.docx	3	3	4,31
China in Chinese and English.docx	3	3	,75
Fiji National AMR Action Plan.docx	3	3	4,13
Malaysia Action Plan on AMR.docx	3	3	5,79
China in Chinese and English.docx	3	3	,61
Fiji National AMR Action Plan.docx	3	3	2,76
Malaysia Action Plan on AMR.docx	3	3	3,94
China in Chinese and English.docx	3	3	2,72
Fiji National AMR Action Plan.docx	3	3	3,26
Malaysia Action Plan on AMR.docx	3	3	4,52
China in Chinese and English.docx	3	3	,33
Fiji National AMR Action Plan.docx	3	3	1,72
Malaysia Action Plan on AMR.docx	3	3	2,2
China in Chinese and English.docx	3	3	,42
Fiji National AMR Action Plan.docx	3	3	,92
Malaysia Action Plan on AMR.docx	3	3	2,14
China in Chinese and English.docx	3	3	,79
Fiji National AMR Action Plan.docx	3	3	1,33
Malaysia Action Plan on AMR.docx	3	3	2,38
China in Chinese and English.docx	3	3	,71
Fiji National AMR Action Plan.docx	3	3	2,72
Malaysia Action Plan on AMR.docx	3	3	4,25
China in Chinese and English.docx	3	3	,74
Fiji National AMR Action Plan.docx	3	3	2
Malaysia Action Plan on AMR.docx	3	3	3,49
Iran National Action Plan for combatting AMR.docx	3	5	7,02
Iraq National Action Plan.docx	3	5	6,7
Jordan National Action Plan for Combating AMR.docx	3	5	12,25
Lebanon National Action Plan on combating AMR.docx	3	5	6,47
Libya National Action Plan on prevention and containment of AMR.docx	3	5	7,88
Iran National Action Plan for combatting AMR.docx	3	5	5,57
Iraq National Action Plan.docx	3	5	3,41
Jordan National Action Plan for Combating AMR.docx	3	5	6,67
Lebanon National Action Plan on combating AMR.docx	3	5	1,77
Libya National Action Plan on prevention and containment of AMR.docx	3	5	2,3
Iran National Action Plan for combatting AMR.docx	3	5	7,41
Iraq National Action Plan.docx	3	5	12,25
Jordan National Action Plan for Combating AMR.docx	3	5	14,83
Lebanon National Action Plan on combating AMR.docx	3	5	10,91
Libya National Action Plan on prevention and containment of AMR.docx	3	5	23,66
Iran National Action Plan for combatting AMR.docx	3	5	5,85
Iraq National Action Plan.docx	3	5	5,75
Jordan National Action Plan for Combating AMR.docx	3	5	7,05
Lebanon National Action Plan on combating AMR.docx	3	5	3,04
Libya National Action Plan on prevention and containment of AMR.docx	3	5	5,85
Iran National Action Plan for combatting AMR.docx	3	5	9,25
Iraq National Action Plan.docx	3	5	12,23
Jordan National Action Plan for Combating AMR.docx	3	5	16,61
Lebanon National Action Plan on combating AMR.docx	3	5	9,6
Libya National Action Plan on prevention and containment of AMR.docx	3	5	10,35
Iran National Action Plan for combatting AMR.docx	3	5	4,5
Iraq National Action Plan.docx	3	5	4,17
Jordan National Action Plan for Combating AMR.docx	3	5	4,69
Lebanon National Action Plan on combating AMR.docx	3	5	2,65
Libya National Action Plan on prevention and containment of AMR.docx	3	5	3,32
Iran National Action Plan for combatting AMR.docx	3	5	5,43
Iraq National Action Plan.docx	3	5	4,48
Jordan National Action Plan for Combating AMR.docx	3	5	5,24
Lebanon National Action Plan on combating AMR.docx	3	5	2,61
Libya National Action Plan on prevention and containment of AMR.docx	3	5	2,72
Iran National Action Plan for combatting AMR.docx	3	5	6,22
Iraq National Action Plan.docx	3	5	2,52
Jordan National Action Plan for Combating AMR.docx	3	5	2,42
Lebanon National Action Plan on combating AMR.docx	3	5	,92
Libya National Action Plan on prevention and containment of AMR.docx	3	5	1,99
Iran National Action Plan for combatting AMR.docx	3	5	6,73
Iraq National Action Plan.docx	3	5	4,32
Jordan National Action Plan for Combating AMR.docx	3	5	4,11
Lebanon National Action Plan on combating AMR.docx	3	5	1,16
Libya National Action Plan on prevention and containment of AMR.docx	3	5	1,7
Iran National Action Plan for combatting AMR.docx	3	5	6,86
Iraq National Action Plan.docx	3	5	5,06
Jordan National Action Plan for Combating AMR.docx	3	5	5,73
Lebanon National Action Plan on combating AMR.docx	3	5	3,2
Libya National Action Plan on prevention and containment of AMR.docx	3	5	4,42
Iran National Action Plan for combatting AMR.docx	3	5	11,92
Iraq National Action Plan.docx	3	5	6,98
Jordan National Action Plan for Combating AMR.docx	3	5	8,7
Lebanon National Action Plan on combating AMR.docx	3	5	4,75
Libya National Action Plan on prevention and containment of AMR.docx	3	5	6,79
Iran National Action Plan for combatting AMR.docx	3	5	6,54
Iraq National Action Plan.docx	3	5	2,84
Jordan National Action Plan for Combating AMR.docx	3	5	5,33
Lebanon National Action Plan on combating AMR.docx	3	5	3
Libya National Action Plan on prevention and containment of AMR.docx	3	5	2,7
Iran National Action Plan for combatting AMR.docx	3	5	3,29
Iraq National Action Plan.docx	3	5	1,99
Jordan National Action Plan for Combating AMR.docx	3	5	2,05
Lebanon National Action Plan on combating AMR.docx	3	5	,93
Libya National Action Plan on prevention and containment of AMR.docx	3	5	,79
Iran National Action Plan for combatting AMR.docx	3	5	4,74
Iraq National Action Plan.docx	3	5	1,99
Jordan National Action Plan for Combating AMR.docx	3	5	2,63
Lebanon National Action Plan on combating AMR.docx	3	5	1,29
Libya National Action Plan on prevention and containment of AMR.docx	3	5	1,11
Iran National Action Plan for combatting AMR.docx	3	5	6,78
Iraq National Action Plan.docx	3	5	5,67
Jordan National Action Plan for Combating AMR.docx	3	5	10,44
Lebanon National Action Plan on combating AMR.docx	3	5	4,67
Libya National Action Plan on prevention and containment of AMR.docx	3	5	6,88
Iran National Action Plan for combatting AMR.docx	3	5	5,01
Iraq National Action Plan.docx	3	5	7,41
Jordan National Action Plan for Combating AMR.docx	3	5	14,47
Lebanon National Action Plan on combating AMR.docx	3	5	3,41
Libya National Action Plan on prevention and containment of AMR.docx	3	5	6,73
Iran National Action Plan for combatting AMR.docx	3	5
Iraq National Action Plan.docx	3	5	5,76
Jordan National Action Plan for Combating AMR.docx	3	5	6,64
Lebanon National Action Plan on combating AMR.docx	3	5	3,44
Libya National Action Plan on prevention and containment of AMR.docx	3	5	6,58
Iran National Action Plan for combatting AMR.docx	3	5	7,11
Iraq National Action Plan.docx	3	5
Jordan National Action Plan for Combating AMR.docx	3	5	10,2
Lebanon National Action Plan on combating AMR.docx	3	5	5,15
Libya National Action Plan on prevention and containment of AMR.docx	3	5	8,43
Iran National Action Plan for combatting AMR.docx	3	5	4,83
Iraq National Action Plan.docx	3	5	3,06
Jordan National Action Plan for Combating AMR.docx	3	5	4,42
Lebanon National Action Plan on combating AMR.docx	3	5	2,11
Libya National Action Plan on prevention and containment of AMR.docx	3	5	2,77
Iran National Action Plan for combatting AMR.docx	3	5	11,16
Iraq National Action Plan.docx	3	5	2,38
Jordan National Action Plan for Combating AMR.docx	3	5	3,62
Lebanon National Action Plan on combating AMR.docx	3	5	2,02
Libya National Action Plan on prevention and containment of AMR.docx	3	5	2,15
Iran National Action Plan for combatting AMR.docx	3	5	5,46
Iraq National Action Plan.docx	3	5	7,98
Jordan National Action Plan for Combating AMR.docx	3	5
Lebanon National Action Plan on combating AMR.docx	3	5	4,71
Libya National Action Plan on prevention and containment of AMR.docx	3	5	5,99
Iran National Action Plan for combatting AMR.docx	3	5	9,08
Iraq National Action Plan.docx	3	5	6,9
Jordan National Action Plan for Combating AMR.docx	3	5	10,3
Lebanon National Action Plan on combating AMR.docx	3	5	5,01
Libya National Action Plan on prevention and containment of AMR.docx	3	5	9,32
Iran National Action Plan for combatting AMR.docx	3	5	5,56
Iraq National Action Plan.docx	3	5	6,02
Jordan National Action Plan for Combating AMR.docx	3	5	7,44
Lebanon National Action Plan on combating AMR.docx	3	5	6,31
Libya National Action Plan on prevention and containment of AMR.docx	3	5	7,91
Iran National Action Plan for combatting AMR.docx	3	5	4,13
Iraq National Action Plan.docx	3	5	5,42
Jordan National Action Plan for Combating AMR.docx	3	5	5,46
Lebanon National Action Plan on combating AMR.docx	3	5
Libya National Action Plan on prevention and containment of AMR.docx	3	5	6,25
Iran National Action Plan for combatting AMR.docx	3	5	4,34
Iraq National Action Plan.docx	3	5	10,1
Jordan National Action Plan for Combating AMR.docx	3	5	8,02
Lebanon National Action Plan on combating AMR.docx	3	5	8,22
Libya National Action Plan on prevention and containment of AMR.docx	3	5
Iran National Action Plan for combatting AMR.docx	3	5	4,63
Iraq National Action Plan.docx	3	5	5,48
Jordan National Action Plan for Combating AMR.docx	3	5	7,09
Lebanon National Action Plan on combating AMR.docx	3	5	2,86
Libya National Action Plan on prevention and containment of AMR.docx	3	5	5,17
Iran National Action Plan for combatting AMR.docx	3	5	3,62
Iraq National Action Plan.docx	3	5	4,58
Jordan National Action Plan for Combating AMR.docx	3	5	10,45
Lebanon National Action Plan on combating AMR.docx	3	5	2,52
Libya National Action Plan on prevention and containment of AMR.docx	3	5	4,7
Iran National Action Plan for combatting AMR.docx	3	5	4,27
Iraq National Action Plan.docx	3	5	3,4
Jordan National Action Plan for Combating AMR.docx	3	5	4,18
Lebanon National Action Plan on combating AMR.docx	3	5	1,61
Libya National Action Plan on prevention and containment of AMR.docx	3	5	2,48
Iran National Action Plan for combatting AMR.docx	3	5	8,57
Iraq National Action Plan.docx	3	5	5,09
Jordan National Action Plan for Combating AMR.docx	3	5	7,67
Lebanon National Action Plan on combating AMR.docx	3	5	3,9
Libya National Action Plan on prevention and containment of AMR.docx	3	5	5,6
Iran National Action Plan for combatting AMR.docx	3	5	7,91
Iraq National Action Plan.docx	3	5	6,26
Jordan National Action Plan for Combating AMR.docx	3	5	6,19
Lebanon National Action Plan on combating AMR.docx	3	5	3,6
Libya National Action Plan on prevention and containment of AMR.docx	3	5	6,76
Iran National Action Plan for combatting AMR.docx	3	5	3,53
Iraq National Action Plan.docx	3	5	4,3
Jordan National Action Plan for Combating AMR.docx	3	5	10,71
Lebanon National Action Plan on combating AMR.docx	3	5	2,22
Libya National Action Plan on prevention and containment of AMR.docx	3	5	4,7
Iran National Action Plan for combatting AMR.docx	3	5	8,02
Iraq National Action Plan.docx	3	5	5,92
Jordan National Action Plan for Combating AMR.docx	3	5	8,72
Lebanon National Action Plan on combating AMR.docx	3	5	4,55
Libya National Action Plan on prevention and containment of AMR.docx	3	5	4,08
Iran National Action Plan for combatting AMR.docx	3	5	4,75
Iraq National Action Plan.docx	3	5	2,37
Jordan National Action Plan for Combating AMR.docx	3	5	2,58
Lebanon National Action Plan on combating AMR.docx	3	5	1,05
Libya National Action Plan on prevention and containment of AMR.docx	3	5	1,05
Iran National Action Plan for combatting AMR.docx	3	5	7,37
Iraq National Action Plan.docx	3	5	6,7
Jordan National Action Plan for Combating AMR.docx	3	5	8,87
Lebanon National Action Plan on combating AMR.docx	3	5	2,72
Libya National Action Plan on prevention and containment of AMR.docx	3	5	6,14
Iran National Action Plan for combatting AMR.docx	3	5	2,76
Iraq National Action Plan.docx	3	5	5,38
Jordan National Action Plan for Combating AMR.docx	3	5	3,44
Lebanon National Action Plan on combating AMR.docx	3	5	3,26
Libya National Action Plan on prevention and containment of AMR.docx	3	5	3,32
Iran National Action Plan for combatting AMR.docx	3	5	4,61
Iraq National Action Plan.docx	3	5	2,41
Jordan National Action Plan for Combating AMR.docx	3	5	3,56
Lebanon National Action Plan on combating AMR.docx	3	5	1,09
Libya National Action Plan on prevention and containment of AMR.docx	3	5	1,39
Iran National Action Plan for combatting AMR.docx	3	5	7,73
Iraq National Action Plan.docx	3	5	5,45
Jordan National Action Plan for Combating AMR.docx	3	5	9,24
Lebanon National Action Plan on combating AMR.docx	3	5	4,64
Libya National Action Plan on prevention and containment of AMR.docx	3	5	7,06
Iran National Action Plan for combatting AMR.docx	3	5	4,09
Iraq National Action Plan.docx	3	5	6,08
Jordan National Action Plan for Combating AMR.docx	3	5	7,51
Lebanon National Action Plan on combating AMR.docx	3	5	4,4
Libya National Action Plan on prevention and containment of AMR.docx	3	5	5,07
Iran National Action Plan for combatting AMR.docx	3	5	6,22
Iraq National Action Plan.docx	3	5	4,92
Jordan National Action Plan for Combating AMR.docx	3	5	6,52
Lebanon National Action Plan on combating AMR.docx	3	5	5,44
Libya National Action Plan on prevention and containment of AMR.docx	3	5	6,38
Iran National Action Plan for combatting AMR.docx	3	5	7,47
Iraq National Action Plan.docx	3	5	9,82
Jordan National Action Plan for Combating AMR.docx	3	5	11,15
Lebanon National Action Plan on combating AMR.docx	3	5	8,55
Libya National Action Plan on prevention and containment of AMR.docx	3	5	12,5
Iran National Action Plan for combatting AMR.docx	3	5	8,97
Iraq National Action Plan.docx	3	5	5,01
Jordan National Action Plan for Combating AMR.docx	3	5	6,29
Lebanon National Action Plan on combating AMR.docx	3	5	2,92
Libya National Action Plan on prevention and containment of AMR.docx	3	5	3,11
Iran National Action Plan for combatting AMR.docx	3	5	10,03
Iraq National Action Plan.docx	3	5	13,68
Jordan National Action Plan for Combating AMR.docx	3	5	13,51
Lebanon National Action Plan on combating AMR.docx	3	5	9,37
Libya National Action Plan on prevention and containment of AMR.docx	3	5	13,31
Iran National Action Plan for combatting AMR.docx	3	5	4,49
Iraq National Action Plan.docx	3	5	3,04
Jordan National Action Plan for Combating AMR.docx	3	5	5,55
Lebanon National Action Plan on combating AMR.docx	3	5	1,41
Libya National Action Plan on prevention and containment of AMR.docx	3	5	2,54
Iran National Action Plan for combatting AMR.docx	3	5	5,46
Iraq National Action Plan.docx	3	5	3,83
Jordan National Action Plan for Combating AMR.docx	3	5	4,7
Lebanon National Action Plan on combating AMR.docx	3	5	2,97
Libya National Action Plan on prevention and containment of AMR.docx	3	5	3,34
Iran National Action Plan for combatting AMR.docx	3	5	6,41
Iraq National Action Plan.docx	3	5	2,99
Jordan National Action Plan for Combating AMR.docx	3	5	3,64
Lebanon National Action Plan on combating AMR.docx	3	5	1,98
Libya National Action Plan on prevention and containment of AMR.docx	3	5	2,15
Iran National Action Plan for combatting AMR.docx	3	5	8,58
Iraq National Action Plan.docx	3	5	9,44
Jordan National Action Plan for Combating AMR.docx	3	5	9,75
Lebanon National Action Plan on combating AMR.docx	3	5	5,25
[truncated: 1,482 more rows]
